1 **Presynaptic  $G\alpha_o$  (GOA-1) signaling depresses command neuron excitability to allow for**  
2 **stretch-dependent modulation of egg-laying behavior in *C. elegans***

3

4 Bhavya Ravi<sup>1,2,3</sup>, Jian Zhao<sup>4,5</sup>, Sana Chaudhry<sup>2</sup>, Mattingly Bartole<sup>1,2</sup>, Christian Guijarro<sup>2,6</sup>, Lijun  
5 Kang<sup>4</sup>, and Kevin M. Collins<sup>1,2,7</sup>

6

7 <sup>1</sup>Neuroscience Program, University of Miami Miller School of Medicine, Miami, FL USA

8 <sup>2</sup>Department of Biology, University of Miami, Coral Gables, FL USA

9 <sup>3</sup>Present address: Department of Neurology, Johns Hopkins University School of Medicine,  
10 Baltimore, MD USA

11 <sup>4</sup>Department of Neuroscience, Zhejiang University School of Medicine, Hangzhou, Zhejiang,  
12 China

13 <sup>5</sup>Present address: Department of Molecular Biology, Massachusetts General Hospital, Boston,  
14 MA USA

15 <sup>6</sup>Present address: ALPS Electric Europe GmbH, Munich, Germany

16

17 <sup>7</sup>To whom correspondence should be addressed:

18 [kevin.collins@miami.edu](mailto:kevin.collins@miami.edu)

19 Department of Biology

20 University of Miami

21 1301 Memorial Drive

22 Coral Gables, FL 33143

23 Tel: (305) 284-9058

24

25 61 pages with 7 Figures, 2 Supplemental Figures, 2 Tables, and 9 Videos

26 Abstract- 150 words, Introduction- 1430 words, Discussion- 1877 words.

27 **Abstract**

28 *Caenorhabditis elegans* egg laying is a two-state behavior modulated by sensory input.  
29 Feedback of egg accumulation in the uterus drives activity of the serotonergic HSN command  
30 neurons to promote the active state, but how aversive sensory stimuli signal to inhibit egg laying  
31 is not well understood. We find the Pertussis Toxin-sensitive G protein,  $G_{\alpha_o}$ , signals in HSN to  
32 inhibit circuit activity and prolong the inactive behavior state.  $G_{\alpha_o}$  signaling hyperpolarizes HSN,  
33 reducing  $Ca^{2+}$  activity and input into the postsynaptic vulval muscles. Loss of inhibitory  $G_{\alpha_o}$   
34 signaling uncouples presynaptic HSN activity from a postsynaptic, stretch-dependent homeostat,  
35 causing precocious entry into the egg-laying active state. NLP-7 neuropeptides signal to reduce  
36 egg laying both by inhibiting HSN and by activating  $G_{\alpha_o}$  in cells other than HSN. Thus,  $G_{\alpha_o}$   
37 integrates diverse signals to maintain a bi-stable state of electrical excitability that dynamically  
38 controls circuit activity and behavior output in response to a changing environment.

39 .

40

41

42

43

44

45

46

## 47 **Introduction**

48           A major goal of neuroscience is to understand how external and internal sensory signals  
49 control the activity of neural circuits to drive changes in animal behavior. Such sensory  
50 information triggers when a particular behavior should be initiated, for how long that behavior  
51 state should be continued, and under what conditions that behavior should be terminated. For  
52 example, hunger initiates searching behavior strategies to locate areas with food, and sensory  
53 feedback of local food availability triggers the termination of searching and the initiation of  
54 feeding (Flavell et al., 2013; Iwanir et al., 2016). Feeding behavior itself might terminate because  
55 external signals indicate food in the local area has been depleted, at which point searching  
56 strategies might resume (Lee et al., 2017; Scholz et al., 2017; Lopez-Cruz et al., 2019). Internal  
57 sensory feedback of satiety might also terminate both foraging and feeding in favor of other  
58 behaviors (You et al., 2008; Gallagher et al., 2013) like mating or reproduction (Gruninger et al.,  
59 2006; LeBoeuf et al., 2007; Gruninger et al., 2008). Extensive evidence has shown that  
60 neuromodulators like serotonin signal through presynaptic and postsynaptic G protein coupled  
61 receptors to drive these behavior state transitions (Jiang et al., 2001; Goulding et al., 2008). Yet,  
62 there is no neural circuit in any organism for which we know precisely how signaling events drive  
63 a serotonin-controlled behavior and how sensory input modulates these events. Small neural  
64 circuits typically found in invertebrate model organisms combine anatomical simplicity with  
65 uniquely powerful genetic and experimental accessibility, allowing for a complete understanding  
66 of the molecular basis for a behavioral output (Marder, 2012).

67           The *C. elegans* female reproductive circuit is ideally suited to study how environmental  
68 and internal sensory signals modulate decision making. The circuit is anatomically simple and  
69 drives alternative egg-laying behavior states that are characterized by ~20 minute inactive  
70 periods punctuated by ~2 minute active states in which ~4-6 eggs are laid in phase with the

71 animal's locomotion (Waggoner et al., 1998; Collins and Koelle, 2013; Collins et al., 2016). As  
72 shown in **Figure 1A**, the circuit is comprised of two Hermaphrodite Specific Neurons (HSNs) that  
73 function as command neurons to promote the active state (Waggoner et al., 1998; Emtage et al.,  
74 2012). Three locomotion motor neurons (VA7, VB6, and VD7) and six cholinergic Ventral C  
75 neurons (VC1-6) synapse onto a set of egg-laying vulval muscles which contract to open the  
76 vulva to release eggs from the uterus into the environment (White et al., 1986). HSNs release  
77 serotonin and NLP-3 neuropeptides that signal to promote the active state of egg laying (Desai  
78 et al., 1988; Brewer et al., 2019). Serotonin signals through several distinct receptors expressed  
79 on vulval muscles (Carnell et al., 2005; Hobson et al., 2006; Xiao et al., 2006). *nlp-3* is predicated  
80 to encode multiple neuropeptides, suggesting multiple receptors may be required in discrete  
81 cells of the egg-laying circuit for NLP-3 activation of the egg-laying active state.  $Ca^{2+}$  imaging  
82 shows cells in the circuit have rhythmic, sequential activity as they enter active states  
83 characterized by 'bursts' of rhythmic  $Ca^{2+}$  activity that drive egg-laying events in phase with the  
84 body bends of locomotion (Zhang et al., 2008; Collins et al., 2016; Zang et al., 2017; Ravi et al.,  
85 2018a). HSN  $Ca^{2+}$  activity peaks ~2 seconds before each egg-laying vulval muscle  $Ca^{2+}$   
86 transient within the active state, and optogenetic activation of the HSNs is sufficient to induce  
87 circuit activity and the active state (Collins et al., 2016). Animals bearing mutations that eliminate  
88 both serotonin and NLP-3 biosynthesis have reduced egg laying and show defects in vulval  
89 muscle  $Ca^{2+}$  activity (Brewer et al., 2019). However, despite strong delays in the onset of egg  
90 laying, HSN-deficient animals will eventually enter active states with coordinated vulval muscle  
91  $Ca^{2+}$  activity that allows efficient egg release (Collins et al., 2016). These results indicate that  
92 while HSN activity is sufficient to induce circuit activity and behavior in adult animals, HSNs are  
93 not strictly required. Other signals must initiate the egg-laying active state in the absence of  
94 HSNs.

95 We have recently identified a stretch-dependent homeostat that scales egg-laying circuit  
96 activity in response to feedback of egg accumulation. Juvenile and young adult animals lacking  
97 eggs in the uterus have low circuit activity, and optogenetic stimulation of the HSNs is unable to  
98 stimulate vulval muscle activity in these animals (Ravi et al., 2018a). Chemical or genetic  
99 sterilization leads to a reduction in both HSN and vulval muscle  $\text{Ca}^{2+}$  activity, locking animals in  
100 the inactive state (Collins et al., 2016; Ravi et al., 2018a). Acute chemogenetic silencing of vulval  
101 muscle electrical activity similarly blocks egg laying and presynaptic HSN  $\text{Ca}^{2+}$  activity. Reversal  
102 of this muscle silencing drives a homeostatic rebound in HSN 'burst' firing  $\text{Ca}^{2+}$  activity where  
103 'bursts' of HSN  $\text{Ca}^{2+}$  transients promote ongoing circuit activity that drives release of the excess  
104 accumulated eggs (Ravi et al., 2018a). Feedback of successful egg release also signals to inhibit  
105 HSN activity. Four uv1 neuroendocrine cells which line the vulval canal are mechanically  
106 activated by the passage of eggs. The uv1 cells are peptidergic and tyraminerpic, and inhibition  
107 of egg laying by tyramine requires the LGC-55 tyramine-gated  $\text{Cl}^-$  channel which is expressed  
108 on the HSNs (Collins et al., 2016). uv1 also expresses the FLP-11 and NLP-7 neuropeptides  
109 that signal to inhibit HSN activity and egg laying through receptors that remain unidentified  
110 (Banerjee et al., 2017). Full NLP-7 inhibition of egg laying requires the EGL-47 receptor and the  
111 G protein,  $G_{\alpha_o}$ , both of which are expressed in HSN (Moresco and Koelle, 2004; Banerjee et al.,  
112 2017). HSN  $\text{Ca}^{2+}$  activity and egg laying are also inhibited by aversive signals from the external  
113 environment. Elevated environmental  $\text{CO}_2$  activates BAG and other sensory neurons (Hallem et  
114 al., 2011; Fenk and de Bono, 2015). BAG releases FLP-17, which binds to EGL-6 receptors on  
115 HSN to activate  $G_{\alpha_o}$  to inhibit HSN activity, neurotransmitter release, and egg laying (Zang et  
116 al., 2017). A major open question is how competing, analog sensory inputs, from internal sensory  
117 feedback of sufficient egg accumulation promoting the active state, to external sensory  
118 information of an unfavorable environment, converge on the same neural circuit to drive  
119 unilateral, binary behavior decisions to enter or leave the egg-laying active state.

120 The major G protein,  $G\alpha_o$ , mediates a large part of the modulatory signaling in the brain  
121 (Jiang et al., 2001), but our understanding of the biochemical consequences of  $G\alpha_o$  signaling *in*  
122 *vivo* remain incomplete. Patient mutations in human *GNAO1* have been identified that disrupt  
123  $G\alpha_o$  plasma membrane localization and inhibition of voltage-gated  $Ca^{2+}$  currents in response to  
124 norepinephrine, with phenotypic consequences including epileptic encephalopathy (Nakamura  
125 et al., 2013). Discovering the conserved mechanisms by which  $G\alpha_o$  inhibits synaptic  
126 transmission in simple neural circuits would inform the development of novel therapies for human  
127 disorders where  $G\alpha_o$  has an important modulatory role. *C. elegans*  $G\alpha_o$  shares more than 80%  
128 sequence identity with its corresponding mammalian ortholog, and knockout mutants show  
129 disrupted serotonin transmission along with hyperactive locomotion and egg-laying behaviors  
130 (Segalat et al., 1995; Koelle and Horvitz, 1996; Koelle, 2016). Loss of  $G\alpha_o$  in *C. elegans* causes  
131 behavior phenotypes that precisely phenocopy the consequences of too much  $G\alpha_q$  signaling  
132 through the PLC $\beta$  and Trio RhoGEF effector pathways (Brundage et al., 1996; Lackner et al.,  
133 1999; Miller et al., 1999; Williams et al., 2007).  $G\alpha_o$  signaling is thought to modulate presynaptic  
134 ion channels (Qin et al., 1997; Peleg et al., 2002; Clancy et al., 2005; Mase et al., 2012), and  
135 genetic studies in *C. elegans* have identified the CCA-1 T-type voltage-gated  $Ca^{2+}$  channels,  
136 NCA  $Na^+$  leak channels, and the IRK inward rectifying  $K^+$  channels as potential downstream  
137 targets of  $G\alpha_o$  signaling (Emtage et al., 2012; Topalidou et al., 2017a; Zang et al., 2017). How  
138  $G\alpha_o$  signaling itself affects egg-laying circuit activity and behavior has not been fully revealed.  
139  $G\alpha_o$  could signal within the active state to reduce the probability of HSN burst firing, shortening  
140 the duration of active states. Alternatively,  $G\alpha_o$  may signal during the inactive state to reduce  
141 HSN excitability and the probability of entering the egg-laying active state. Whether and how  
142 such inhibitory signaling acts alongside the stretch-dependent homeostat is similarly unclear.  
143  $G\alpha_o$  signaling in HSN has been found to inhibit *tph-1* gene expression and serotonin biosynthesis

144 (Tanis et al., 2008), suggesting long-term changes in serotonin transmission might also  
145 contribute to the dramatic egg-laying behavior phenotypes seen in  $G\alpha_o$  signaling mutants.

146 Here we explore how  $G\alpha_o$  signals to inhibit *C. elegans* egg-laying circuit activity and  
147 behavior. Our data reveal that  $G\alpha_o$  signaling reduces the electrical excitability of a command  
148 neuron, allowing the circuit to execute a binary behavior decision upon the alignment of optimal  
149 external and internal sensory conditions.

150

## 151 **Results**

152  $G\alpha_o$  signaling inhibits egg-laying behavior in *C. elegans*. Animals with too much  $G\alpha_o$   
153 signaling retain eggs in their uterus, while  $G\alpha_o$  loss-of-function or null mutants retain fewer eggs  
154 (Tanis et al., 2008). Embryos in such hyperactive egg-laying mutants also spend less time  
155 developing in the uterus and are laid at earlier stages of development, typically fewer than eight  
156 cells per embryo. Whether  $G\alpha_o$  manipulations caused a change in the duration of the active state  
157 (e.g. how frequently eggs are laid within an active state), duration of the inactive state (how  
158 frequently animals enter an egg-laying active state), or both, remains unclear. To better  
159 understand how inhibitory  $G\alpha_o$  signaling contributes to the pattern of circuit activity that underlies  
160 two-state behaviors, we analyzed the temporal pattern of egg laying during adult active states in  
161  $G\alpha_o$  signaling mutants.

162

163 **Reduced inhibitory  $G\alpha_o$  signaling leads to premature egg laying and decreases the**  
164 **duration of egg-laying inactive states**

165 We find that  $G\alpha_o$  signals to inhibit the onset of egg laying. We performed a ‘time to first  
166 egg’ assay in wild-type animals and in mutants with too much or too little  $G\alpha_o$  signaling. As  
167 previously described, wild-type animals release their first embryo ~6-7 hours after becoming  
168 adults (Ravi et al., 2018a). Animals bearing  $G\alpha_o$  loss-of-function or null mutations laid their eggs  
169 much earlier, 3-4 hours after becoming adults (Figure 1B). *n1134*, a hypomorphic mutant  
170 predicted to lack the conserved N-terminal myristoylation and palmitoylation sequence, and  
171 *sa734*, an early stop mutant predicted to be a molecular null (Segalat et al., 1995; Robotzek and  
172 Thomas, 2000), showed a similar precocious onset in egg laying (Figure 1B). This phenotype  
173 was shared in transgenic animals where  $G\alpha_o$  function was inhibited just in HSNs through the  
174 cell-specific expression of Pertussis Toxin (Tanis et al., 2008). Because the timing of this first  
175 egg-laying event requires serotonin and HSN activity (Ravi et al., 2018a), these results suggest  
176 that  $G\alpha_o$  normally signals in HSN to inhibit neurotransmitter release and thereby delay the first  
177 egg-laying active state (Figure 1B). To test the effects of increased  $G\alpha_o$  signaling, we analyzed  
178 the behavior of *egl-10(md176)* mutants which lack the major RGS protein that terminates  $G\alpha_o$   
179 signaling by promoting  $G\alpha_o$  GTP hydrolysis (Koelle and Horvitz, 1996). *egl-10(md176)* mutants  
180 showed a strong and significant delay in the onset of egg laying, laying their first egg ~15 hours  
181 after reaching adulthood (Figure 1B); this delay is similar to animals without HSNs (Ravi et al.,  
182 2018a). This delay in egg laying phenotype was shared in transgenic animals expressing the  
183 constitutively active  $G\alpha_o$  (Q205L) mutant specifically in the HSNs, consistent with  $G\alpha_o$  signaling  
184 in HSN acting to inhibit neurotransmitter release.

185 To understand how  $G\alpha_o$  signaling controls the normal two-state pattern of egg laying, we  
186 made long-term recordings of adults as they transitioned into and out of the active states in which  
187 clusters of several eggs are typically laid. Intervals between egg-laying events were operationally  
188 classified into two categories: intra-cluster intervals and inter-cluster intervals, as previously



189 described (Waggoner et al., 1998; Collins and Koelle, 2013; Banerjee et al., 2017; Zang et al.,  
190 2017; Chew et al., 2018). Intra-cluster intervals (< 4 minutes) are intervals between consecutive  
191 egg laying events within a single active state. Inter-cluster intervals (> 4 minutes) are the  
192 intervals between distinct active states, and thus provide us with a measure of the frequency of  
193 egg-laying active states (Waggoner et al., 1998). Wild-type animals displayed a two-state pattern  
194 of egg laying with multiple egg-laying events clustered within brief, ~2 minute active states about  
195 every 20-30 minutes (Figure 1C and Table 1). Animals with reduced inhibitory  $G\alpha_o$  signaling  
196 entered active states 2-3-fold more frequently, often laying single eggs during active states  
197 separated by only ~12-13 minutes (Figure 1C and Table 1). The pattern of egg-laying events in  
198 animals expressing Pertussis Toxin in the HSN neurons was indistinguishable from the *goa-*  
199 *1(n1134)* hyperactive egg laying mutant, indicating that  $G\alpha_o$  signals in HSN to reduce the  
200 probability of entering the active state (Figure 1C; Figure Supplement 1; and Table 1). Loss of  
201 inhibitory  $G\alpha_o$  signaling led to active states in which the 1-2 embryos in the uterus were laid  
202 almost immediately after they were positioned next to the vulval opening. As a result, successive  
203 egg-laying events were rate-limited by egg production, and the average intra-cluster intervals  
204 were typically double that of wild-type animals (Figure 1C, Figure Supplement 1, and Table 1).  
205 In contrast, *egl-10(md176)* mutant animals and animals expressing the  $G\alpha_o(Q205L)$  gain-of-  
206 function mutant in the HSNs had infrequent egg laying, lengthening the average inactive period  
207 to 258 and 67 min, respectively (Figure 1C, Supplemental Figure 1, and Table 1). Interestingly,  
208 animals with too much  $G\alpha_o$  signaling still laid eggs in clusters of multiple eggs (Table 1),  
209 consistent with our results showing that a stretch-dependent homeostat can maintain the active  
210 state even when neurotransmitter release from the HSN is inhibited (Collins et al., 2016; Ravi et  
211 al., 2018a). These results show that  $G\alpha_o$  signaling does not modulate patterns of egg laying  
212 within active states. Instead,  $G\alpha_o$  specifically acts to determine how frequently animals enter into

213 the egg-laying active state. In addition, these results suggest that  $G\alpha_o$  signals to inhibit egg-  
214 laying behavior even under 'optimal' laboratory growth and culture conditions.

215

### 216 **$G\alpha_o$ signaling inhibits HSN $Ca^{2+}$ activity to promote the inactive behavior state**

217 To understand how  $G\alpha_o$  signaling regulates HSN activity, we performed ratiometric  $Ca^{2+}$   
218 imaging in our panel of  $G\alpha_o$  signaling mutants. Animals bearing the *goa-1(n1134)* hypomorphic  
219 or *goa-1(sa734)* null mutations that reduce inhibitory  $G\alpha_o$  signaling showed a clear change in  
220 HSN  $Ca^{2+}$  activity from burst to more tonic firing (Figure 2A, Videos 1-3). Complete loss of  
221 inhibitory  $G\alpha_o$  signaling caused a significant increase in the frequency of HSN  $Ca^{2+}$  transients  
222 (Figure 2B and 2C). We were surprised that the *goa-1(n1134)* mutants, which show strongly  
223 hyperactive egg-laying behavior indistinguishable from that of *goa-1(sa734)* null mutants,  
224 showed only a modest and insignificant increase in HSN  $Ca^{2+}$  activity compared to wild-type  
225 (Figure 2C). The *goa-1(n1134)* hypomorphic mutant is expected to have residual  $G\alpha_o$  signaling  
226 activity in that its major defect is the absence of a proper membrane anchor sequence (Mumby  
227 et al., 1990). These results suggest that the hyperactive egg-laying phenotypes observed in *goa-*  
228 *1(n1134)* mutants are separable from changes in presynaptic HSN  $Ca^{2+}$  activity. Instead, these  
229 behavioral effects may be a consequence of inhibitory  $G\alpha_o$  signaling outside of HSN and/or  
230 secondary changes in serotonin biosynthesis (Segalat et al., 1995; Tanis et al., 2008).

231 We next tested how increased inhibitory  $G\alpha_o$  signaling affects HSN activity. Both *egl-*  
232 *10(md176)* mutants and transgenic animals expressing the activated GOA-1(Q205L) in HSNs  
233 showed a significant and dramatic reduction in the frequency of HSN  $Ca^{2+}$  transients, with single  
234 HSN  $Ca^{2+}$  transients occurring several minutes apart (Figure 2A and 2B). The rare egg-laying  
235 events seen in animals with increased  $G\alpha_o$  signaling were mostly associated with single HSN  
236  $Ca^{2+}$  transients, not the multi-transient bursts seen in wild-type animals (Figure 2A and 2C). In

237 one *egl-10(md176)* animal, we observed one egg-laying event that was not accompanied by an  
238 HSN  $\text{Ca}^{2+}$  transient. This suggests that elevated  $\text{G}\alpha_o$  signaling may effectively silence the HSNs,  
239 and that, in this case, egg laying becomes HSN-independent. Consistent with this model,  
240 complete silencing of HSNs in *egl-10(md176)* and *egl-1(n986dm)* mutants that lack HSNs show  
241 similar defects in the timing of first egg laid (Ravi et al., 2018a). Alternatively (or additionally)  $\text{G}\alpha_o$   
242 signaling may function to depress coordinated activity between the gap-junctioned, contralateral  
243 HSNs, whose  $\text{Ca}^{2+}$  activity we were unable to observe simultaneously because our confocal  
244 imaging conditions only captures one HSN at a time.

245 To determine how disruption of inhibitory  $\text{G}\alpha_o$  signaling in HSN affects neuronal activity,  
246 we recorded HSN  $\text{Ca}^{2+}$  transients in transgenic animals expressing Pertussis Toxin specifically  
247 in the HSNs.  $\text{G}\alpha_o$  silenced HSNs showed a dramatic increase in the frequency of HSN  $\text{Ca}^{2+}$   
248 activity, leading to a nearly constitutive tonic firing activity similar to that observed in *goa-*  
249 *1(sa734)* null mutants (Figure 3A, 3B, and 3C; compare Videos 4 and 5). While control animals  
250 showed an average HSN  $\text{Ca}^{2+}$  transient frequency of about ~0.4 transients per minute, animals  
251 expressing Pertussis Toxin in HSN showed an average 1.9 transients per minute, a significant  
252 increase (Figure 3C). These results suggest that unidentified neurotransmitters and/or  
253 neuropeptides signal even under 'optimal' steady-state growth conditions to activate HSN  
254 receptors and  $\text{G}\alpha_o$ , to reduce cell excitability, allowing the observed two-state pattern of HSN  
255 activity and egg-laying behavior. Importantly, these results show that  $\text{G}\alpha_o$  signals cell-  
256 autonomously in HSN to inhibit  $\text{Ca}^{2+}$  activity. Such changes in cell excitability by  $\text{G}\alpha_o$  signaling  
257 are expected to precede presynaptic UNC-13 localization (Nurrish et al., 1999) and/or long-term  
258 changes in serotonin biosynthesis (Tanis et al. 2008).

259 We have previously shown that burst  $\text{Ca}^{2+}$  activity in the command HSN neurons is  
260 initiated and sustained by a stretch-dependent homeostat. In chemically or genetically sterilized

261 animals, burst  $\text{Ca}^{2+}$  activity in HSN is largely eliminated (Ravi et al., 2018a). As such, we were  
262 surprised to observe high frequency  $\text{Ca}^{2+}$  transients in  $\text{G}\alpha_o$  signaling mutants because these  
263 animals typically retain few (1 to 3) eggs in the uterus at steady state, conditions that normally  
264 eliminate HSN burst firing. We hypothesized that the stretch-dependent homeostat was not  
265 required to promote HSN  $\text{Ca}^{2+}$  activity in  $\text{G}\alpha_o$  signaling mutants. To test this, we chemically  
266 sterilized transgenic animals expressing Pertussis Toxin in the HSNs with Floxuridine (FUDR),  
267 a blocker of embryogenesis, and recorded HSN  $\text{Ca}^{2+}$  activity. Wild-type animals treated with  
268 FUDR showed a dramatic decrease in the frequency of HSN  $\text{Ca}^{2+}$  activity and an elimination of  
269 burst firing (Figures 3A-C). Sterilized transgenic animals expressing Pertussis Toxin in the HSNs  
270 showed only a slight reduction in HSN  $\text{Ca}^{2+}$  frequency (Figure 3A and 3B). Both fertile and sterile  
271 Pertussis Toxin expressing animals had significantly increased HSN  $\text{Ca}^{2+}$  transient frequency  
272 ( $\sim 1.9$  / min), indicating their HSNs no longer require the retrograde signals of egg accumulation  
273 arising from the stretch-homeostat. One explanation for this could be that in wild-type animals,  
274 the retrograde burst-inducing signal is necessary to maintain firing threshold in the presence of  
275 inhibitory  $\text{G}\alpha_o$  signaling.

276

### 277 **Presynaptic $\text{G}\alpha_o$ signaling inhibits postsynaptic vulval muscle activity**

278 To test how changes in inhibitory  $\text{G}\alpha_o$  signaling affect the postsynaptic vulval muscles, we  
279 recorded  $\text{Ca}^{2+}$  activity in the vulval muscles of *goa-1(n1134)* mutant and Pertussis Toxin  
280 expressing transgenic animals. Active states were operationally defined as beginning one  
281 minute before the laying of the first egg and concluding one minute after the last egg-laying event.  
282 As shown in Figure 4, inactive state vulval muscle  $\text{Ca}^{2+}$  twitching activity is slightly increased in  
283 *goa-1(n1134)* mutants but is dramatically increased in transgenic animals expressing Pertussis

284 Toxin in the presynaptic HSN neurons, confirming an increase in neurotransmitter release from  
285 the HSNs. Surprisingly, egg-laying active state  $Ca^{2+}$  activity in *goa-1(n1134)* mutants was not  
286 significantly different from that seen in wild-type control animals (Figure 4A and 4B; compare  
287 Videos 6 and 7). In contrast, the frequency of strong vulval muscle  $Ca^{2+}$  transients that  
288 accompany the active states was significantly increased in animals expressing Pertussis Toxin  
289 in HSN (Figure 4C and 4D; compare Videos 8 and 9). We have previously shown that egg  
290 accumulation promotes vulval muscle excitability during the active state while sterilization  
291 reduces vulval muscle activity to that of the inactive state (Collins et al., 2016; Ravi et al., 2018a).  
292 To our surprise, FUDR treatment significantly reduced vulval muscle  $Ca^{2+}$  activity in animals  
293 expressing Pertussis Toxin in HSN (Figure 4C and 4D), despite the FUDR-insensitivity of  
294 presynaptic HSN  $Ca^{2+}$  activity in these animals (Figure 3C). Vulval muscle  $Ca^{2+}$  activity after  
295 FUDR treatment was still higher in animals expressing Pertussis Toxin in HSNs compared to  
296 similarly treated wild-type animals (Figure 4C and 4D). This result suggests that vulval muscle  
297 activity remains dependent on egg accumulation and/or germline activity even when HSN activity  
298 is dramatically increased. However, because these animals lay eggs almost as soon as they are  
299 made, the degree of stretch necessary to induce the active state must be markedly reduced.

300

### 301 **G $\alpha_o$ signaling modulates the HSN resting membrane potential**

302 Reduction of inhibitory G $\alpha_o$  signaling strongly increased HSN  $Ca^{2+}$  activity and burst firing,  
303 prompting us to investigate whether G $\alpha_o$  signaling modulates HSN electrical excitability. We  
304 recorded the resting membrane potential of the HSN neurons in animals with altered G $\alpha_o$   
305 signaling using the whole-cell patch clamp method (Figure 5A), as described (Yue et al., 2018).  
306 Hypomorphic *goa-1(n1143)* loss-of-function mutants displayed a trend towards more

307 depolarized resting potentials (-17.9 mV) compared to wild-type animals (-21.1 mV), but this  
308 difference was not statistically significant (Figure 5B). In contrast, the resting membrane potential  
309 of HSNs in *egl-10(md176)*  $G\alpha_o$  RGS protein mutant animals with a global increase in  $G\alpha_o$   
310 signaling (Koelle and Horvitz, 1996) was significantly hyperpolarized (-40.8 mV) compared to  
311 wild-type control animals. This hyperpolarization of HSNs in *egl-10(md176)* mutants explains the  
312 reduced frequency of HSN  $Ca^{2+}$  transients and their strongly reduced egg-laying behavior.  
313 Transgenic animals expressing Pertussis Toxin specifically in the HSNs had significantly  
314 depolarized HSNs (-14.75 mV) compared to the wild-type parental strain (-21.8 mV). These  
315 results show that  $G\alpha_o$  signals in the HSNs to promote membrane polarization, reducing cell  $Ca^{2+}$   
316 activity and neurotransmitter release.

317

### 318 **Inhibition of egg laying by $G\alpha_o$ is not replicated by elevated $\beta\gamma$ expression**

319 Receptor activation of  $G\alpha_{i/o}$  heterotrimers releases  $\beta\gamma$  subunits which have previously  
320 been shown to bind to activate specific  $K^+$  channels and inhibit  $Ca^{2+}$  channels (Reuveny et al.,  
321 1994; Herlitze et al., 1996). To test if over-expression of  $\beta\gamma$  subunit in HSN would similarly inhibit  
322 egg laying, we transgenically overexpressed the *C. elegans*  $G\beta$  protein and  $G\gamma$  protein subunits  
323 GPB-1 and GPC-2 under the *tph-1* promoter along with GFP. We did not observe any significant  
324 differences in steady-state egg accumulation (Figure 5C). The number of eggs stored *in-utero* in  
325 these animals ( $13.0 \pm 1.1$ ) was comparable to wildtype animals ( $15.7 \pm 1.2$ ) and less than *egl-*  
326 *10(md176)* mutant animals ( $44.53 \pm 2.3$ ). These results suggest that  $G\alpha_o$  signals to inhibit HSN  
327 activity and egg laying via effectors distinct from simple titration or release of  $\beta\gamma$  subunits.

328

### 329 **Egg-laying behavior is dysregulated in cAMP and cGMP signaling mutants**

330 As shown in **Figure 5D (top)** receptor activation of  $G_{\alpha_{i/o}}$  heterotrimers may also affect  
331 cAMP or cGMP levels and their subsequent activation of protein kinases (Kobayashi et al., 1990;  
332 Zhang and Pratt, 1996; Matsubara, 2002; Ghil et al., 2006). Receptor activation of  $G_{\alpha_s}$  activates  
333 adenylylase, and the cAMP produced activates protein kinase A (PKA) which  
334 phosphorylates unidentified downstream effectors to augment neurotransmitter release (Koelle,  
335 2016). Mutations that increase  $G_{\alpha_s}$  signaling in *C. elegans* cause hyperactive locomotion  
336 resembling that of animals lacking inhibitory  $G_{\alpha_o}$  signaling (Schade et al., 2005; Charlie et al.,  
337 2006a). How  $G_{\alpha_s}$  and cAMP signaling affect egg-laying behavior and whether this is antagonized  
338 by  $G_{\alpha_o}$  has not been previously reported. We find that animals carrying *gsa-1(ce81)* gain-of-  
339 function mutations predicted to increase  $G_{\alpha_s}$  signaling accumulate fewer eggs compared to wild-  
340 type animals (**Figure 5D, middle**). Because a reduction in steady-state egg accumulation could  
341 result from indirect effects on egg production or brood size, we examined the developmental age  
342 of embryos laid. Loss of inhibitory  $G_{\alpha_o}$  signaling causes embryos to be laid previously, before  
343 they reach the 8-cell stage (**Figure 5D, bottom**).  $G_{\alpha_s}$  gain-of-function mutant animals do not show  
344 a corresponding increase in early-stage embryos that are laid, suggesting the reduction in egg  
345 accumulation observed is indirect. In contrast, gain-of-function *acy-1* Adenylylase  
346 mutations or loss-of-function *pde-4* phosphodiesterase mutations, both predicted to increase  
347 cAMP signaling (Schade et al., 2005; Charlie et al., 2006a), cause animals to accumulate fewer  
348 eggs and lay them at earlier stages (**Figure 5D**). Similarly, *kin-2* mutant animals predicted to  
349 have increased Protein Kinase A activity (Schade et al., 2005) showed a modest but significant  
350 hyperactive egg-laying phenotype. Together, these results indicate that  $G_{\alpha_s}$ , cAMP, and Protein  
351 Kinase A signal to promote egg-laying behavior, phenotypes which are consistent with  $G_{\alpha_o}$   
352 acting to antagonize  $G_{\alpha_s}$  signaling.

353 Previous work has shown that loss of the cGMP-dependent Protein Kinase G in *C.*  
354 *elegans* reduces egg laying (Trent et al., 1983; Fujiwara et al., 2002; L'Etoile et al., 2002; Raizen  
355 et al., 2006; Hao et al., 2011). Mutations which increase activity of Protein Kinase G increase  
356 egg laying while loss of Protein Kinase G signaling reduces it (Figure 5D, middle). To determine  
357 whether  $G\alpha_o$  and Protein Kinase G regulate egg laying in a shared pathway, we performed a  
358 genetic epistasis experiment. *goa-1(sa734); egl-4(n479)* double null mutants accumulate very  
359 few eggs (Figure 5D, middle), resembling the *goa-1(sa734)* null mutant. However, the low brood  
360 size of the *goa-1(sa734)* mutant could prevent accurate measurement of these animal's egg-  
361 laying defects. To address this, we measured the stage of eggs laid. Loss of the EGL-4 Protein  
362 Kinase G strongly and significantly suppressed the hyperactive egg-laying behavior of  $G\alpha_o$  null  
363 mutants (Figure 5D, bottom). *goa-1(sa734); egl-4(n479)* mutants laid 33% of their embryos at  
364 early stages compared to 88% for the *goa-1(sa734)* single mutant. The eggs laid by these double  
365 mutants were at wild-type stages of development, not at late stages typically observed from *egl-*  
366 *4(n479)* single mutants (Trent et al., 1983). These results are consistent with  $G\alpha_o$  acting  
367 upstream or parallel to cGMP and/or Protein Kinase G signaling to regulate egg-laying behavior.

368

### 369 **$G\alpha_o$ signals in other cells of the egg-laying circuit to regulate behavior**

370 GOA-1 is expressed in all neurons of the reproductive circuit, the egg-laying vulval  
371 muscles, and the uv1 neuroendocrine cells (Jose et al., 2007), raising questions as to what  $G\alpha_o$   
372 is doing in those cells to regulate egg-laying behavior. Previous work has shown that transgenic  
373 expression of the activated GOA-1(Q205L) specifically in the HSNs, and not the VCs or vulval  
374 muscles, was sufficient to rescue the hyperactive egg-laying behavior of *goa-1(n1134)* mutants  
375 (Tanis et al., 2008). Previous work failing to identify a function for  $G\alpha_o$  in the vulval muscles used



376 a modified *Nde*-box element from the *ceh-24* promoter that drives expression more efficiently in  
377 the vm1 muscle cells compared to the vm2 muscles innervated by the HSN and VC neurons.  
378 Expression of Pertussis Toxin in both vm1 and vm2 vulval muscles from a larger region of the  
379 *ceh-24* gene promoter (Harfe and Fire, 1998; Ravi et al., 2018a), failed to cause any significant  
380 changes in the steady-state egg accumulation (Figure 5–figure supplement 1A). Conversely,  
381 expression of the activated GOA-1(Q205L) in the vulval muscles from the same promoter did  
382 cause a modest but significant egg-laying defect, with animals accumulating  $24.1 \pm 2.0$  eggs  
383 compared to mCherry-expressing control animals ( $13.2 \pm 0.7$  eggs). This egg-laying defect was  
384 significantly weaker than *egl-10(md176)* mutants or transgenic animals expressing GOA-  
385 1(Q205L) in the HSNs. We do not believe this modest egg-laying defect was caused by  
386 transgene expression outside of the vulval muscles, as expression of Tetanus Toxin from the  
387 *ceh-24* promoter showed no such egg-laying defect (Figure 5–figure supplement 1B).  
388 Collectively, these results show that  $G\alpha_o$  does not play a significant role in suppressing vulval  
389 muscle excitability under state-state conditions but activated  $G\alpha_o$  can signal in these cells to  
390 induce a mild but significant inhibition of cell activity and egg-laying behavior.

391 The uv1 cells synthesize and release neurotransmitter tyramine and neuropeptides  
392 encoded by genes *nlp-7* and *flp-11* which inhibit egg laying (Alkema et al., 2005; Collins et al.,  
393 2016; Banerjee et al., 2017). Based on the function of  $G\alpha_o$  signaling in inhibiting neurotransmitter  
394 release in neurons, we would expect that loss of  $G\alpha_o$  in uv1 would enhance excitability,  
395 promoting release of inhibitory tyramine and neuropeptides, causing a reduction of egg laying.  
396 Surprisingly, previous work has shown that transgenic expression of Pertussis Toxin in uv1 cells  
397 increased the frequency of early-stage eggs that are laid, similar to the blocking of  
398 neurotransmitter release by Tetanus Toxin (Jose et al., 2007). A caveat of these experiments  
399 was that transgene expression was driven by the *ocr-2* gene promoter that, in addition to the

400 uv1 cells, is also expressed in the utse (uterine-seam) associated cells and head sensory  
401 neurons. To test whether  $G\alpha_o$  functions specifically in uv1 to regulate egg laying we used the  
402 *tdc-1* gene promoter (Alkema et al., 2005) along with the *ocr-2* 3' untranslated region (Jose et  
403 al., 2007) to drive expression more specifically in uv1. Expression of Pertussis Toxin in uv1  
404 caused a significant decrease in steady-state egg accumulation ( $10.9\pm 1.5$ ) compared to  
405 mCherry-expressing control animals ( $15.3\pm 1.2$ ) (Figure 5–figure supplement 1C). We also tested  
406 how elevated  $G\alpha_o$  signaling in uv1 affects egg laying. Transgenic expression of the activated  
407 GOA-1(Q205L) mutant in uv1 cells caused no quantitative differences in egg accumulation  
408 ( $15.5\pm 2.1$  eggs) (Figure 5–figure supplement 1C). Together, these results show that  $G\alpha_o$  has a  
409 limited role in regulating egg-laying behavior in the vulval muscles or uv1 neuroendocrine cells,  
410 unlike the strong phenotypes observed when we manipulate  $G\alpha_o$  function in HSN.

411

## 412 **Neuropeptide NLP-7 signals through $G\alpha_o$ to inhibit egg laying independent of the HSNs**

413 Multiple neuropeptides and receptors have been identified that are thought to inhibit egg  
414 laying via signaling through  $G\alpha_o$ -coupled receptors expressed on HSN (Figure 1A). FLP-17 and  
415 FLP-10 neuropeptides activate the  $G\alpha_o$ -coupled EGL-6 receptors on the HSN to inhibit egg  
416 laying, and this inhibition depends upon the IRK-1  $K^+$  channel which functions to depress HSN  
417 excitability (Ringstad and Horvitz, 2008; Emtage et al., 2012). Gain-of-function mutations in the  
418 HSN-expressed gustatory-like receptor, EGL-47, also strongly inhibit egg-laying behavior  
419 (Moresco and Koelle, 2004). Genetic epistasis experiments are consistent with the interpretation  
420 that EGL-47, like EGL-6, signals through  $G\alpha_o$  in the HSNs to inhibit egg laying, but the ligands  
421 which activate EGL-47 are not known (Moresco and Koelle, 2004). Recent work has identified  
422 NLP-7 neuropeptides, synthesized in the VC neurons and uv1 neuroendocrine cells, as potential

423 ligands for EGL-47 and  $G\alpha_o$  signaling (Banerjee et al., 2017). Animals overexpressing the NLP-  
424 7 neuropeptide are highly egg-laying defective, accumulating  $39.6\pm 3.4$  eggs in the uterus (Figure  
425 6A). To test how NLP-7 signals through  $G\alpha_o$  to inhibit HSN activity and egg laying, we crossed  
426 NLP-7 over-expressing transgenes into *goa-1* mutant animals and evaluated their egg-laying  
427 behavior phenotypes. *goa-1(n1134)* loss-of-function and *goa-1(sa734)* null mutants showed a  
428 mild and strong suppression of the egg-laying defect of NLP-7 overexpressing animals with  
429 animals storing  $23.3\pm 2.5$  and  $9.3\pm 1.8$  eggs, respectively (Figure 6A). To confirm that  $G\alpha_o$  was  
430 required for NLP-7 inhibition of egg laying, we measured the stage of embryos laid by these  
431 animals. *goa-1(sa734)* null mutant animals over-expressing NLP-7 laid ~100% of their embryos  
432 at early stages, and this was not significantly different from 98% of embryos laid at early stages  
433 by *goa-1(sa734)* single mutant animals (Figure 6B). Together, these results strongly suggest  
434 that NLP-7 neuropeptides signal to activate  $G\alpha_o$  and inhibit egg laying.

435 Since the HSNs appear to be the principal sites of inhibitory  $G\alpha_o$  signaling, we tested how  
436 NLP-7 over-expression affects HSN  $Ca^{2+}$  activity. As expected, over-expression of NLP-7  
437 strongly inhibited HSN  $Ca^{2+}$  activity (Figure 6C and 6D), consistent with the strong egg-laying  
438 defects of these animals. To our surprise, loss of  $G\alpha_o$  failed to restore HSN  $Ca^{2+}$  transient activity  
439 in NLP-7 overexpressing animals, despite showing the strong hyperactive egg-laying behavior  
440 of *goa-1(sa734)* single mutants. These results indicate that although NLP-7 signals to silence  
441 HSN  $Ca^{2+}$  activity, it does not require  $G\alpha_o$  function to do so. Moreover, it suggests that egg laying  
442 in animals fully lacking inhibitory  $G\alpha_o$  signaling is independent of HSN activity, consistent with  
443 previous results that report *goa-1* null mutants lacking HSNs still lay primarily early-stage eggs  
444 (Segalat et al., 1995). Thus, NLP-7 neuropeptides and  $G\alpha_o$  signal to inhibit egg-laying behavior  
445 through cellular targets other than the HSNs.

446

## 447 Discussion

448 Using a combination of genetic, imaging, physiological, and behavioral approaches, we  
449 found that the conserved G protein,  $G\alpha_o$ , coordinates behavior transitions between periods of  
450 embryo accumulation and release. Activated  $G\alpha_o$  signals to depress HSN command neuron  
451 excitability and neurotransmitter release, ensuring the egg-laying circuit becomes active only  
452 when sufficient eggs in the uterus. Without inhibitory  $G\alpha_o$  signaling, presynaptic HSN command  
453 neurons remain excitable, and HSN  $Ca^{2+}$  activity becomes tonic and insensitive to retrograde  
454 feedback from the stretch-dependent homeostat. As a result, animals lacking  $G\alpha_o$  enter the egg-  
455 laying active state twice as frequently as wild-type animals. In spite of this, the hyperactive egg-  
456 laying behavior of  $G\alpha_o$  mutant animals is not ‘constitutive.’ The increased postsynaptic vulval  
457 muscle  $Ca^{2+}$  activity of  $G\alpha_o$  mutants requires egg accumulation and remains sensitive to  
458 sterilization, suggesting that feedback of egg accumulation acts primarily on the vulval muscles.  
459 Conversely, the HSNs are hyperpolarized in animals with too much inhibitory  $G\alpha_o$  signaling, and  
460 behavior and pharmacological experiments suggest they rarely release neurotransmitters (Trent  
461 et al., 1983; Koelle and Horvitz, 1996). As a result, the timing of egg-laying active states in  
462 animals with elevated inhibitory  $G\alpha_o$  signaling appears largely driven by an increase in activity  
463 in cells other than HSN.

464 Our results inform our understanding of how G protein signaling modulates the stretch-  
465 dependent homeostat that governs egg-laying behavior (Figure 7). Egg laying in wild-type  
466 animals typically begins ~6 hours after the L4-adult molt upon the accumulation of 5-8 eggs in  
467 the uterus (Ravi et al., 2018a). Loss of inhibitory  $G\alpha_o$  signaling causes the first egg-laying event  
468 to occur ~2 hours earlier, with one or two embryos being laid soon after they are deposited into  
469 the uterus. Conversely, mutations that increase inhibitory  $G\alpha_o$  signaling delay egg laying to a

470 similar extent as loss of HSNs, until feedback of egg accumulation is sufficient to drive egg-  
471 laying circuit activity and behavior (Collins et al., 2016; Ravi et al., 2018a). Mutations in the  
472 excitatory  $G\alpha_q$  signaling pathway show precisely the opposite phenotypes as those seen for  $G\alpha_o$ ,  
473 with eggs being laid later when  $G\alpha_q$  signaling is reduced and earlier when  $G\alpha_q$  signaling is  
474 increased (Bastiani et al., 2003). Aversive sensory input, or feedback of successful egg release,  
475 drives release of neurotransmitters and neuropeptides that signal through inhibitory receptors  
476 and  $G\alpha_o$  to promote exit of the egg-laying active state. Together, these results suggest a working  
477 two-state model for how a balance of inhibitory and excitatory signaling through distinct G  
478 proteins is responsible for the accumulation of 12-15 eggs at steady-state and the laying of 3-5  
479 eggs per active state (Figure 7).

480 Does G protein signaling control circuit excitability via modulation of the stretch-  
481 dependent homeostat?  $G\alpha_o$  signaling directly affects HSN cell excitability, but in the absence of  
482 HSNs, animals still initiate egg laying after sufficient egg accumulation in the uterus, and this  
483 circuit activity is eliminated upon sterilization (Collins et al., 2016). Thus, even though modulation  
484 of HSN activity is a major consequence of the stretch-dependent homeostat, the homeostat still  
485 operates in the absence of HSN function. Consistent with this result, HSNs where  $G\alpha_o$  function  
486 is blocked through cell-specific expression of Pertussis Toxin show little loss of  $Ca^{2+}$  activity after  
487 chemical sterilization. However, in these animals, vulval muscle  $Ca^{2+}$  activity is still significantly  
488 reduced by sterilization. This result suggests even dramatically potentiated HSN  $Ca^{2+}$  activity  
489 cannot drive egg-laying without feedback of egg accumulation. This stretch-dependent,  
490 homeostatic gating of HSN is consistent with our previous results showing that optogenetic  
491 stimulation of HSNs fails to induce vulval muscle  $Ca^{2+}$  activity in animals with too few eggs in  
492 the uterus (Ravi et al., 2018a). Despite the dramatic increase in vulval muscle  $Ca^{2+}$  transient  
493 frequency upon HSN-specific inactivation of  $G\alpha_o$ , we rarely observe strong egg-laying muscle

494 contractions until there is an egg properly position above the vulva. This suggests the presence  
495 of conditional, feed-forward signaling mechanisms that provide additional excitatory input into  
496 the vulval muscles when an egg is ready for release. Determining whether the stretch-dependent  
497 homeostat modulates circuit activity via direct effects on cell electrical excitability, or through  
498 indirect signaling mechanisms, will require the identification of molecules and their sites of action  
499 within the stretch-dependent homeostat. We predict that loss of molecules required for detecting  
500 egg accumulation and uterine stretch would disrupt the observed rebound of egg-laying behavior  
501 after acute inhibition by aversive sensory signaling, starvation, or acute circuit silencing (Dong  
502 et al., 2000; Ravi et al., 2018a).

503 Our work suggests  $G\alpha_o$  signals in HSN and in cells outside of the egg-laying circuit to  
504 inhibit egg-laying behavior. GOA-1 is expressed in all *C. elegans* neurons and muscle cells  
505 (Mendel et al., 1995; Segalat et al., 1995) along with cells in the egg-laying circuit (Jose et al.,  
506 2007). Pertussis Toxin expression in the HSNs causes hyperactive egg-laying behavior  
507 phenotypes that closely resemble *goa-1* null and loss-of-function mutants (Tanis et al., 2008).  
508 By contrast, Pertussis Toxin expression in VCs, vulval muscles, or *uv1* causes no or very modest  
509 increase in egg laying (Tanis et al., 2008). Expression of the Q205L GTP-locked  $G\alpha_o$  mutant in  
510 HSNs delays the onset of egg laying and steady-state egg accumulation to a similar degree as  
511 *egl-10* mutants lacking the  $G\alpha_o$  RGS protein or animals without HSNs, leading to the suggestion  
512 that  $G\alpha_o$  largely functions in HSN to inhibit neurotransmitter release and egg laying (Koelle and  
513 Horvitz, 1996; Tanis et al., 2008; Ravi et al., 2018a). However, *goa-1* null mutants lacking HSNs  
514 still show hyperactive egg-laying behavior (Segalat et al., 1995), suggesting that  $G\alpha_o$  signals to  
515 inhibit neurotransmitter release in cells other than HSN to regulate egg laying. We find that NLP-  
516 7 over-expression largely silences HSN  $Ca^{2+}$  activity and blocks egg-laying behavior, consistent  
517 with previous results (Banerjee et al., 2017). Our data further show that NLP-7 inhibition of egg

518 laying requires  $G_{\alpha_o}$  function, but that loss of  $G_{\alpha_o}$  does not rescue NLP-7 inhibition of HSN  $Ca^{2+}$   
519 activity. This suggests that NLP-7 signals to inhibit HSN and egg laying via distinct pathways.  
520 NLP-7 is predicted to be processed into four distinct peptides, and previous work has shown that  
521 NLP-7 inhibition of egg laying requires EGL-47, a receptor expressed on HSN (Banerjee et al.,  
522 2017). Because EGL-47 inhibition of HSN activity and egg laying depends upon  $Cl^-$  extruding  
523 transporters KCC-2 and ABTS-1 (Tanis et al., 2009; Bellemer et al., 2011), different NLP-7  
524 peptides may activate distinct receptors on HSN and other cells to inhibit egg laying. NLP-7 over-  
525 expression causes additional behavior phenotypes including sluggish locomotion, and  $G_{\alpha_o}$   
526 signals to inhibit neurotransmitter release from cholinergic motor neurons that synapse onto the  
527 body wall muscles that drive locomotion. Our previous work has shown that the vulval muscles  
528 are rhythmically excited in phase with locomotion, and that this input into the vulval muscles is  
529 enhanced during the egg-laying active state (Collins and Koelle, 2013). We proposed that the  
530 VA7 and VB6 motor neurons that synapse onto the vm1 vulval muscles may mediate this  
531 rhythmic input into the vulval muscles (White et al., 1986; Collins et al., 2016). As such, NLP-7  
532 may signal through  $G_{\alpha_o}$ -coupled receptors on the VA/VB motor neurons to inhibit acetylcholine  
533 release. Global loss of  $G_{\alpha_o}$  inhibition may result in sufficiently high levels of ACh release from  
534 these motor neurons to hyperactivate vulval muscle  $Ca^{2+}$  activity and drive egg release.

535         Several models for how  $G_{\alpha_o}$  signals to regulate neurotransmitter release have been  
536 proposed, and our work is consistent with  $G_{\alpha_o}$  acting to inhibit multiple G protein effector  
537 pathways instead of within a single, dedicated pathway. A major target of  $G_{\alpha_{i/o}}$  family of G  
538 proteins include inward rectifying  $K^+$  channels thought to be activated by release of  $\beta\gamma$  subunits  
539 (Hille, 1994). Previous work has shown the IRK-1  $K^+$  channel is expressed in HSN and is  
540 required for inhibition of egg laying by the  $G_{\alpha_o}$ -coupled EGL-6 neuropeptide receptor (Emtage  
541 et al., 2012). We do not observe behavior phenotypes upon over-expression of  $\beta\gamma$  in HSN,

542 suggesting  $G_{\alpha_o}$  may signal to inhibit HSN activity via direct effectors of the  $G_{\alpha}$  subunit. We find  
543 that mutations which increase cAMP and cGMP signaling cause hyperactive egg-laying behavior  
544 phenotypes that resemble loss of inhibitory  $G_{\alpha_o}$  signaling. Such phenotypes would be consistent  
545 with a model where  $G_{\alpha_o}$  signals to inhibit cAMP production and/or activate cGMP-specific  
546 phosphodiesterases. Protein Kinase G signaling has been shown to regulate the expression of  
547 a secreted protein in the uterine epithelium whose levels correlate with egg-laying rate (Hao et  
548 al., 2011). cAMP and cGMP signaling has well-established roles in the regulation of muscle  
549 contractility in response to stretch (Tsai and Kass, 2009). Because feedback of egg  
550 accumulation directly modulates egg-laying circuit activity, future work will be required to  
551 determine the relationship between  $G_{\alpha_o}$  signaling, cyclic nucleotides, and uterine stretch in the  
552 sensory modulation of the stretch-dependent homeostat.

553       Loss of inhibitory  $G_{\alpha_o}$  signaling converts HSN  $Ca^{2+}$  activity from two-state bursting to tonic  
554 firing. Genetic studies have identified several  $Na^+$  and  $Ca^{2+}$  channels that regulate egg laying  
555 whose modulation by G protein signaling might underlie changes in HSN activity. NALCN  $Na^+$   
556 leak channels are expressed in HSN, and gain-of-function mutations increase HSN  $Ca^{2+}$  activity  
557 and cause hyperactive egg-laying behavior (Yeh et al., 2008). Genetically, NALCN channels are  
558 downstream of both  $G_{\alpha_o}$  and  $G_{\alpha_q}$ , suggesting that NALCN channels could be targets for direct  
559 modulation by either or both G protein signaling pathways (Lutas et al., 2016; Topalidou et al.,  
560 2017b). Recent work has also shown that  $G_{\alpha_q}$  promotes neurotransmitter release via  
561 Ras/ERK/MAPK signaling (Coleman et al., 2018). Recent work has shown that TMC channels  
562 are similarly responsible for a background  $Na^+$  leak conductance in both HSN and the vulval  
563 muscles that promotes cell excitability and egg-laying behavior (Yue et al., 2018). At present,  
564 genetic epistasis experiments have not determined whether TMC channels act in parallel to or  
565 downstream of G protein signaling. As such,  $G_{\alpha_o}$  and  $G_{\alpha_q}$  signaling may modulate egg-laying



566 circuit activity via differential activation of protein kinases which phosphorylate TMC and/or  
567 NALCN channels to regulate their activity or surface expression. Modulation of voltage-gated  
568 Ca<sup>2+</sup> channels might also contribute to the observed changes in HSN electrical excitability. HSN  
569 expresses L-type, P/Q-type, and T-type Ca<sup>2+</sup> channels (Mathews et al., 2003; Zang et al., 2017),  
570 and mutations of these channels disrupt egg-laying behavior (Schafer and Kenyon, 1995; Lee  
571 et al., 1997; Mathews et al., 2003; Gao and Zhen, 2011; Laine et al., 2014). Mutations that  
572 increase Ca<sup>2+</sup> channel opening at lower voltages cause hyperactive egg-laying behavior,  
573 consistent with these channels acting to promote depolarization of both the HSNs and vulval  
574 muscles. Recent studies have shown that both neurons and muscles in *C. elegans* show Ca<sup>2+</sup>  
575 dependent spiking (Gao and Zhen, 2011; Liu et al., 2011; Liu et al., 2018), and these are  
576 regulated by both L-type (EGL-19) and T-type (CCA-1) Ca<sup>2+</sup> channels. T-type channels such as  
577 CCA-1 can contribute to a 'window current' where the channel can pass current at depolarized  
578 potentials that are insufficient to trigger channel inactivation (Zang et al., 2017). Activation of  
579 these window currents might allow neurons like HSN to shift from spontaneous tonic firing to  
580 high frequency Ca<sup>2+</sup> bursting. Future work leveraging the powerful molecular tools uniquely  
581 available in *C. elegans* and the egg-laying circuit along with direct physiological measurements  
582 should provide deep mechanistic insight into how medically important neuromodulators like  
583 serotonin and neuropeptides signal through G<sub>αo</sub> and G<sub>αq</sub> to shape patterns of circuit activity in  
584 health and human disease.

585

586

587

588

## 589 **Materials and Methods**

### 590 **Nematode Culture and Developmental Staging**

591 *Caenorhabditis elegans* hermaphrodites were maintained at 20°C on Nematode Growth Medium  
592 (NGM) agar plates with *E. coli* OP50 as a source of food as described (Brenner, 1974). For  
593 assays involving young adults, animals were age-matched based on the timing of completion of  
594 the L4 larval molt. All assays involving adult animals were performed using age-matched adult  
595 hermaphrodites 20-40 hours past the late L4 stage. **Table 2** lists all strains used in this study  
596 and their genotypes.

597

### 598 **Plasmid and Strain Construction**

599 Calcium reporter transgenes

600 **HSN Ca<sup>2+</sup>**: HSN Ca<sup>2+</sup> activity was visualized using LX2004 *vsIs183 [nlp-3::GCaMP5::nlp-3*  
601 *3'UTR + nlp-3::mCherry::nlp-3 3'UTR + lin-15(+)] lite-1(ce314) lin-15(n765ts) X* strain expressing  
602 GCaMP5G and mCherry from the *nlp-3* promoter as previously described (Collins et al., 2016).  
603 To visualize HSN Ca<sup>2+</sup> activity in Gα<sub>o</sub> signaling mutants, we crossed LX2004 *vsIs183 lite-*  
604 *1(ce314) lin-15(n765ts) X* males with MT2426 *goa-1(n1134) I*, DG1856 *goa-1(sa734) I*, and  
605 MT8504 *egl-10(md176) V* hermaphrodites, and the fluorescent cross-progeny were allowed to  
606 self, generating MIA210 *goa-1(n1143) I; vsIs183 X lite-1(ce314) lin-15 (n765ts) X*, MIA263 *goa-*  
607 *1(sa734) I; vsIs183 X lite-1(ce314) lin-15 (n765ts) X*, and MIA216 *egl-10(md176) V; vsIs183 lite-*  
608 *1(ce314) lin-15(n765ts) X* strains, respectively. We noticed repulsion between *vsIs183* and the  
609 *vsIs50* transgene that expresses the catalytic subunit of Pertussis Toxin from the *tph-1* promoter,  
610 suggesting both were linked to the X chromosome. As such, LX850 *vsIs50 lin-15(n765ts) X*  
611 males were crossed with LX1832 *lite-1(ce314) lin-15(n765ts) X* hermaphrodites, the non-Muv

612 progeny were allowed to self, and homozygous *lite-1(ce314)* non-Muv animals were kept,  
613 generating the strain MIA218 *vsIs50 lite-1(ce314) lin-15(n765ts) X*. MIA218 males were then  
614 crossed with LX2007 *vsIs186; lite-1(ce314) lin-15(n765ts) X*; the cross-progeny were allowed to  
615 self, generating MIA227 *vsIs186; vsIs50 lite-1(ce314) lin-15(n765ts) X*. In order to visualize HSN  
616  $Ca^{2+}$  activity in transgenic animals expressing a constitutively active mutant GOA-1<sup>Q205L</sup> protein  
617 that increases  $G\alpha_o$  signaling in the HSN neurons, LX2004 *vsIs183 lite-1(ce314) lin-15(n765ts)*  
618 *X* males were crossed with LX849 *vsIs49; lin-15(n765ts) X* hermaphrodites. As above, we noted  
619 a repulsion between the *vsIs183* and *vsIs49* transgenes integrated on *X*. As such, we selected  
620 a strain MIA277 with trans-heterozygous *vsIs49* and *vsIs183* transgenes (*lite-1(ce314) vsIs49 X*  
621 / *lite-1(ce314) vsIs183 X*) for  $Ca^{2+}$  imaging. The MIA277 strain was maintained by picking  
622 phenotypically egg-laying defective adult animals which show GCaMP/mCherry expression.

623 **Vulval Muscle  $Ca^{2+}$ :** Vulval muscle  $Ca^{2+}$  activity was recorded in adult animals using LX1918  
624 *vsIs164 [unc-103e::GCaMP5::unc-54 3'UTR + unc-103e::mCherry::unc-54 3'UTR + lin-15(+)]*  
625 *lite-1(ce314) lin-15(n765ts) X* strain as described (Collins et al., 2016). To visualize vulval muscle  
626 activity in  $G\alpha_o$  signaling mutants, LX1918 males were crossed with MT2426 *goa-1(n1134) I*,  
627 DG1856 *goa-1(sa734) I*, MT8504 *egl-10(md176) V* hermaphrodites, and the fluorescent cross-  
628 progeny were allowed to self, generating MIA214 *goa-1(n1134) I; vsIs164 lite-1(ce314) lin-*  
629 *15(n765ts) X*, MIA295 *goa-1(sa734) I; vsIs164 lite-1(ce314) lin-15(n765ts) X*, and MIA290 *egl-*  
630 *10(md176) ; vsIs164 lite-1(ce314) lin-15(n765ts) X* strains, respectively. To visualize vulval  
631 muscle activity in transgenic animals expressing the catalytic subunit of Pertussis Toxin in the  
632 HSN neurons (Tanis et al., 2008), MIA218 *vsIs50 lite-1(ce314) lin-15(n765ts) X* males were  
633 crossed with LX1919 *vsIs165 [unc-103e::GCaMP5::unc-54 3'UTR + unc-103e::mCherry::unc-*  
634 *54 3'UTR + lin-15(+)]*; *lite-1(ce314) lin-15(n765ts) X* hermaphrodites, and the cross progeny  
635 were allowed to self, generating MIA245 *vsIs50; vsIs165; lite-1(ce314) lin-15(n765ts) X*. To  
636 visualize vulval muscle activity in transgenic animals expressing a constitutively active mutant

637 GOA-1<sup>Q205L</sup> protein which increases Gα<sub>o</sub> signaling in the HSN neurons (Tanis et al., 2008),  
638 LX849 *vsIs49; lin-15(n765ts)* X males were crossed with LX1919 *vsIs165; lite-1(ce314) lin-*  
639 *15(n765ts)* X hermaphrodites and the fluorescent cross-progeny were allowed to self, generating  
640 MIA291 *vsIs165; vsIs50 lite-1(ce314) lin-15(n765ts)* X.

641

642 Transgenes used to manipulate Gα<sub>o</sub> signaling in the HSN neurons, vulval muscles, and uv1  
643 neuroendocrine cells

644 **HSN neurons:** To produce a HSN (and NSM)-specific GPB-1 expressing construct, the *gpb-1*  
645 cDNA fragment was amplified from pDEST-*gpb-1* (Yamada et al., 2009) using the following  
646 oligonucleotides: 5'- GAGGCTAGCGTAGAAAAAATGAGCGAACTTGACCAACTTCGA-3' and  
647 5'-GCGGGTACCTCATTAATTCCAGATCTTGAGGAACGAG-3'. The ~1 kb DNA fragment was  
648 digested with NheI/KpnI and ligated into pJT40A (Tanis et al., 2008) to generate pBR30. To  
649 produce an HSN (and NSM)-specific GPC-2 expressing construct, the *gpc-2* cDNA fragment  
650 was amplified from worm genomic DNA using the following forward and reverse  
651 oligonucleotides: 5'-GAGGCTAGCGTAGAAAAAATGGATAAATCTGACATGCAACGA-3' and  
652 5'-GCGGGTACCTTAGAGCATGCTGCACTTGCT-3'. The ~250 bp DNA fragment was digested  
653 with NheI/KpnI and ligated into pJT40A to generate pBR31. To co-overexpress the βγ G protein  
654 subunits in the HSN neurons, we injected pBR30 (50ng/μl), pBR31 (50ng/μl), and pJM60 [*ptph-*  
655 *1::GFP*] (80 ng/μl) (Moresco and Koelle, 2004) into the LX1832 *lite-1(ce314) lin-15(n765ts)*  
656 animals along with pLI5EK (50 ng/μl), generating five independent extrachromosomal transgenic  
657 lines which were used for behavioral assays. One representative transgenic strain, MIA278  
658 [*keyEx52; lite-1(ce314) lin-15(n765ts)*], was kept. To generate a control strain for comparison in  
659 the egg-laying assays, we injected pJM66 [*ptph-1::empty*] (100 ng/μl) (Tanis et al., 2008) and  
660 pJM60 (80 ng/μl) into the LX1832 *lite-1(ce314) lin-15(n765ts)* animals along with pLI5EK (50  
661 ng/μl) generating five independent extrachromosomal control transgenes which were used for

662 behavioral assays. One representative transgenic strain, MIA279 [*keyEx53; lite-1(ce314) lin-*  
663 *15(n765ts)*], was kept.

664 **Vulval muscles:** pJT40A (*ptph-1::Pertussis Toxin* (Tanis et al., 2008) was digested with  
665 NheI/KpnI and ligated into pBR3 (*pceh-24::mCherry*) to generate pBR20. pBR20 [*pceh-*  
666 *24::Pertussis Toxin*] (10 ng/μl) and pBR3 [*pceh-24::mCherry*] (10 ng/μl) were injected into the  
667 LX1832 *lite-1(ce314) lin-15(n765ts)* animals along with pLI5EK (50 ng/μl) to generate five  
668 independent extrachromosomal transgenes which were used for behavioral assays. One  
669 representative transgenic strain, MIA257 [*keyEx46; lite-1(ce314) lin-15(n765ts)*], was kept. To  
670 produce vulval muscle-specific GOA-1(Q205L), the coding sequence of GOA-1(Q205L) was  
671 recovered from pJM70C (Tanis et al., 2008) after digestion with NheI/SacI and ligated into  
672 pKMC188 (*punc-103e::GFP*; (Collins and Koelle, 2013)) generating pKMC268 (*punc-103e::goa-*  
673 *1(Q205L)*). However, because the *unc-103e* promoter also directs expression in neurons that  
674 might indirectly regulate egg laying, GOA-1(Q205L) coding sequences were removed from  
675 pKMC268 by digesting with NheI/NcoI and ligated into pBR3 to generate pBR21. pBR21 [*pceh-*  
676 *24::GOA-1<sup>Q205L</sup>*] (10 ng/μl) and pBR3 [*pceh-24::mCherry*] (10 ng/μl) were injected into the  
677 LX1832 *lite-1(ce314) lin-15(n765ts)* animals along with pLI5EK (50 ng/μl) to generate five  
678 independent extrachromosomal transgenes which were used for behavior assays. One  
679 representative transgenic strain, MIA258 [*keyEx47; lite-1(ce314) lin-15(n765ts)*], was kept. To  
680 generate control strains for comparison in egg-laying assays, pBR3 [*pceh-24::mCherry*] (20  
681 ng/μl) was injected into the LX1832 *lite-1(ce314) lin-15(n765ts)* animals along with pLI5EK (50  
682 ng/μl) to generate five independent extrachromosomal transgenes which were used for  
683 behavioral assays. One representative control transgenic strain, MIA256 [*keyEx45; lite-1(ce314)*  
684 *lin-15(n765ts)*], was kept. To produce a vulval muscle-specific Tetanus Toxin transgene,  
685 Tetanus Toxin coding sequences were amplified from pAJ49 (*pocr-2::Tetanus toxin*) (Jose et al.,  
686 2007) using the following oligonucleotides: 5'-

687 GAGGCTAGCGTAGAAAAAATGCCGATCACCATCAACAACCTTC-3' and 5'-  
688 GCGCAGGCGGCCGCTCAAGCGGTACGGTTGTACAGGTT-3'. The DNA fragment was  
689 digested with NheI/NotI and ligated into pBR6 to generate pBR27. To block any possible  
690 neurotransmitter release from the vulval muscles, pBR27 (10 ng/μl) and pBR3 (10 ng/μl) was  
691 injected into the LX1832 *lite-1(ce314) lin-15(n765ts)* animals along with pLI5EK (50 ng/μl) to  
692 generate five independent extrachromosomal transgenes which were used for behavior assays.  
693 One representative transgenic strain, MIA262 [*keyEx51; lite-1(ce314) lin-15(n765ts)*], was kept.  
694 **uv1 neuroendocrine cells:** To generate a uv1 cell-specific Pertussis toxin transgene, pBR20  
695 (*pceh-24::Pertussis toxin*) was digested with NheI/NcoI and the coding sequences of Pertussis  
696 Toxin were then ligated into pAB5 (*ptdc-1::mCherry::ocr-2 3'UTR*) to generate pBR25. pBR25  
697 [*ptdc-1::Pertussis Toxin*] (10 ng/μl) and pAB5 [*ptdc-1::mCherry*] (5 ng/μl) were injected into  
698 LX1832 *lite-1(ce314) lin-15(n765ts)* animals along with pLI5EK (50 ng/μl) to generate five  
699 independent extrachromosomal transgenes which were used for behavioral assays. One  
700 representative transgenic strain, MIA260 [*keyEx49; lite-1(ce314) lin-15(n765ts)*], was kept. To  
701 generate a uv1 cell-specific GOA-1(Q205L) transgene, pKMC268 (*punc-103e::GOA-1(Q205L)*)  
702 was digested with NheI/NcoI and the coding sequences of GOA-1(Q205L) were then ligated into  
703 pBR25 to generate pBR26. To increase Gα<sub>o</sub> signaling in uv1 cells, we injected pBR26 [*ptdc-*  
704 *1::GOA-1<sup>Q205L</sup>*] (10 ng/μl) and pAB5 [*ptdc-1::mCherry*] (5 ng/μl) into the LX1832 *lite-1(ce314) lin-*  
705 *15(n765ts)* animals along with pLI5EK (50 ng/μl) to generate five independent  
706 extrachromosomal transgenes which were used for behavioral assays. One transgenic strain  
707 MIA261 [*keyEx50; lite-1(ce314) lin-15(n765ts)*] was kept. To generate a control strain for  
708 comparison in our egg-laying assays, pAB5 [*ptdc-1::mCherry*] (15 ng/μl) was injected into the  
709 LX1832 *lite-1(ce314) lin-15(n765ts)* animals along with pLI5EK (50 ng/μl) to generate five  
710 independent extrachromosomal transgenes which were used for behavioral assays. One  
711 representative transgenic strain, MIA259 [*keyEx48; lite-1(ce314) lin-15(n765ts)*], was kept.

## 712 **Fluorescence Imaging**

713 ***Ratiometric Ca<sup>2+</sup> Imaging:*** Ratiometric Ca<sup>2+</sup> recordings were performed on freely behaving  
714 animals mounted between a glass coverslip and chunk of NGM agar, as previously described  
715 (Collins and Koelle, 2013; Li et al., 2013; Collins et al., 2016; Ravi et al., 2018b). Briefly,  
716 recordings were collected on an inverted Leica TCS SP5 confocal microscope using the 8 kHz  
717 resonant scanner at ~20 fps at 256x256 pixel resolution, 12-bit depth and ≥2X digital zoom using  
718 a 20x Apochromat objective (0.7 NA) with the pinhole opened to ~20 μm. GCaMP5G and  
719 mCherry fluorescence was excited using a 488 nm and 561 nm laser lines, respectively. Adult  
720 recordings were performed 24 hours after the late L4 stage. After staging, animals were allowed  
721 to adapt for ~30 min before imaging. During imaging, the stage and focus were adjusted  
722 manually to keep the relevant cell/pre-synapse in view and in focus.

723 Ratiometric analysis (GCaMP5:mCherry) for all Ca<sup>2+</sup> recordings was performed after  
724 background subtraction using Volocity 6.3.1 as described (Collins et al., 2016; Ravi et al., 2018a).  
725 The egg-laying active state was operationally defined as the period one minute prior to the first  
726 egg-laying event and ending one minute after the last (in the case of a typical active phase where  
727 3-4 eggs are laid in quick succession). However, in cases where two egg-laying events were  
728 apart by >60 s, peaks were considered to be in separate active phases and any transients  
729 observed between were considered to be from an inactive state. In animals where we observed  
730 no Ca<sup>2+</sup> peaks during the entire recording, the total duration of the recording was considered an  
731 inter-transient interval. In animals where we observed a single Ca<sup>2+</sup> transient, the duration from  
732 the start of the recording to the time of the Ca<sup>2+</sup> transient and the time from the Ca<sup>2+</sup> transient to  
733 the end of the recording were counted as inter-transient intervals.

## 734 **Behavior Assays and Microscopy**

735 ***Animal sterilization:*** Animals were sterilized using Floxuridine (FUDR). Briefly, 100  $\mu$ l of 10  
736 mg/ml FUDR was applied to OP50 seeded NGM plates. Late L4 animals were then staged onto  
737 the FUDR plates and the treated adults were imaged 24 hours later.

738 ***Egg laying assays:*** Unlaid eggs were quantitated as described (Chase et al., 2004). Staged  
739 adults were obtained by picking late L4 animals and culturing them for 30-40 hr at 20°C. The  
740 percentage of early-stage eggs laid were quantified as described (Koelle and Horvitz, 1996). 30  
741 staged adults were placed on a thin lawn of OP50 bacteria on a nematode growth medium  
742 (NGM) agar plate (Brenner, 1974) and allowed to lay eggs for 30 min. This was repeated with  
743 new sets of staged animals until a total of at least 100 laid eggs were analyzed. Each egg was  
744 examined under a Leica M165FC stereomicroscope and categorized into the following  
745 categories: eggs which have 1 cell, 2 cell, 3-4 cell, 5-8 cell, and embryos with >8 cells. Eggs with  
746 eight cells or fewer were classified as “early stage.”

747 ***Long-term recording of egg-laying behavior:*** Egg-laying behavior was recorded at 4-5 frames  
748 per second from 24-hour adults after transfer to NGM plates seeded with a thin lawn of OP50  
749 bacterial food using a Leica M165FC stereomicroscope and camera (Grasshopper 3, 4.1  
750 Megapixel, USB3 CMOS camera, Point Grey Research). N2 wild-type and hyperactive egg-  
751 laying mutant strains (MT2426 and LX850) were recorded for 3 hours, and the egg-laying  
752 defective strains MT8504 and LX849 were recorded for 8-10 hours.

753

## 754 **Electrophysiology**

755 Electrophysiological recordings were carried out on an upright microscope (Olympus BX51WI)  
756 coupled with an EPC-10 amplifier and Patchmaster software (HEKA), as previously described



757 (Yue et al., 2018; Zou et al., 2018). Briefly, day 2 adult worms were glued on the surface of  
758 Sylgard-coated coverslips using the cyanoacrylate-based glue (Glutire Topical Tissue Adhesive,  
759 Abbott Laboratories). A dorsolateral incision was made using a sharp glass pipette to expose  
760 the cell bodies of HSN neurons for recording. The bath solution contained (in mM) 145 NaCl, 2.5  
761 KCl, 5 CaCl<sub>2</sub>, 1 MgCl<sub>2</sub>, and 20 glucose (325–335 mOsm, pH adjusted to 7.3). The pipette solution  
762 contained (in mM) 145 KCl, 5 MgCl<sub>2</sub>, 5 EGTA, 0.25 CaCl<sub>2</sub>, 10 HEPES, 10 glucose, 5 Na<sub>2</sub>ATP  
763 and 0.5 NaGTP (315–325 mOsm, pH adjusted to 7.2) The resting membrane potentials were  
764 tested with 0 pA holding under the Current Clamp model of whole-cell patch.

765

## 766 **Experimental Design and Statistical Analysis**

767 Sample sizes for behavioral assays followed previous studies (Chase et al., 2004; Collins and  
768 Koelle, 2013; Collins et al., 2016). No explicit power analysis was performed before the study.  
769 Statistical analysis was performed using Prism 6 (GraphPad). Ca<sup>2+</sup> transient peak amplitudes  
770 and inter-transient intervals were pooled from multiple animals (typically ~10 animals per  
771 genotype/condition per experiment). No animals or data were excluded. Individual *p* values are  
772 indicated in each Figure legend, and all tests were corrected for multiple comparisons  
773 (Bonferroni for ANOVA and Fisher exact test; Dunn for Kruskal-Wallis).

774

## 775 **Disclosures / Conflict of Interests**

776 The authors declare no conflicts of interest.

777

778

779 **Acknowledgements**

780 This work was funded by grants from the NIH (R01-NS086932) and NSF (IOS-1844657) to KMC.  
781 Strains used in this study have been provided to the *C. elegans* Genetics Center, which is funded  
782 by NIH Office of Research Infrastructure Programs (P40 OD010440). We thank Addys Bode  
783 Hernandez for expert technical assistance. We thank James Baker, Julia Dallman, Laura Bianchi,  
784 Brock Grill, Peter Larsson, Mason Klein, Stephen Roper, and members of the Collins lab for  
785 helpful discussions and feedback on the manuscript.

786

787 **Figures**

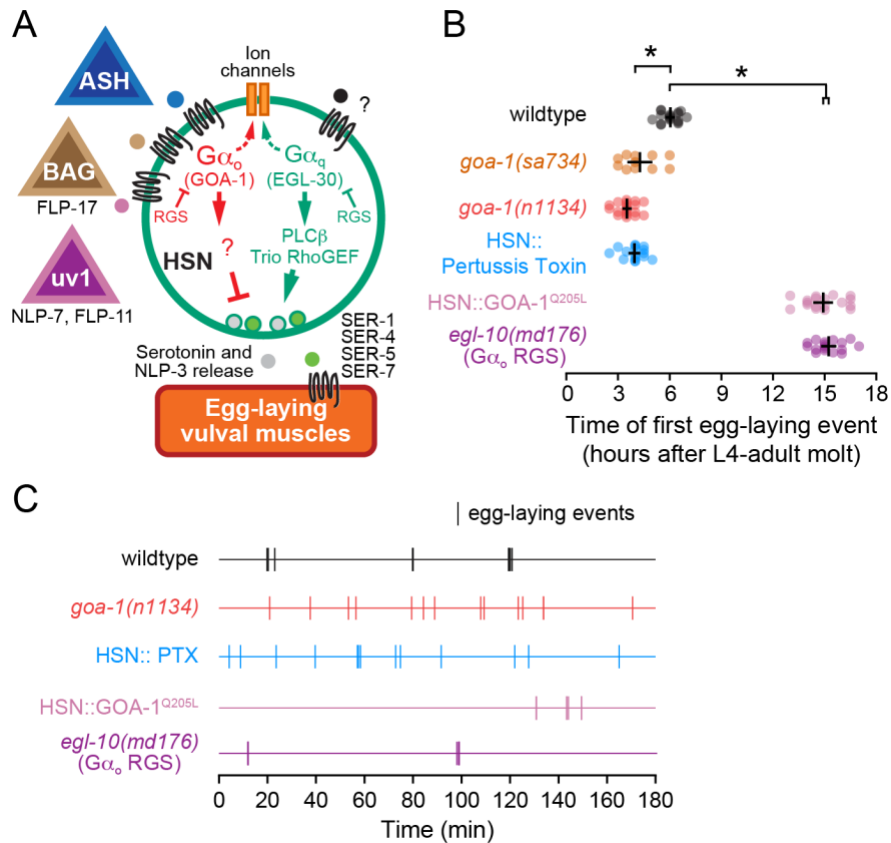

788

789 **Figure 1. Gα<sub>o</sub> signaling maintains the inactive egg-laying behavior state.**

790 **(A)** Cartoon of how neuropeptides released from ASH, BAG, and uv1 sensory cells bind to G-  
 791 protein coupled receptors expressed on HSN command neurons (green) which signal via Gα<sub>o</sub>  
 792 or Gα<sub>q</sub> effector pathways to modulate HSN excitability and neurotransmitter release. The egg-  
 793 laying vulval muscles (orange) express receptors for serotonin and possibly NLP-3 which signal  
 794 to promote vulval muscle excitability and egg laying **(B)** Scatter plots of the first egg-laying event  
 795 in wildtype (grey), null *goa-1(sa734)* mutants (orange), hypomorphic loss-of-function *goa-1*  
 796 *(n1134)* mutants (red), *egl-10(md176)* null mutants (purple), and transgenic animals expressing  
 797 Pertussis Toxin (blue) and GOA-1<sup>Q205L</sup> in the HSNs (pink). Error bars show 95% confidence  
 798 intervals for the mean from ≥10 animals. Asterisks indicate p≤0.0001 (One-way ANOVA with  
 799 Bonferroni correction for multiple comparisons). **(C)** Representative raster plots showing

800 temporal pattern of egg laying during three hours in wild-type (black), hypomorphic loss-of-  
801 function *goa-1(n1134)* mutant (red), and *egl-10(md176)* null mutant animals (purple), along with  
802 transgenic animals expressing Pertussis Toxin (blue) and GOA-1<sup>Q205L</sup> in the HSNs (pink).  
803 Vertical lines indicate single egg-laying events.

804

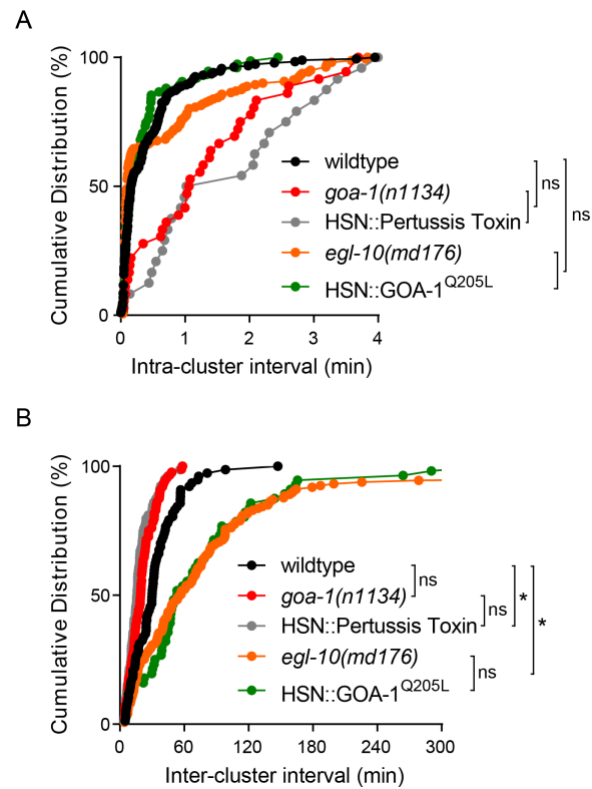

805

806 **Figure 1–figure supplement 1.  $G\alpha_o$  signaling prolongs the interval between egg-laying**  
807 **active states.**

808 (A) and (B) Cumulative distributions of intra-cluster and inter-cluster intervals in wild-type (black),  
809 *goa-1(n1134)* mutant (red), and *egl-10(md176)* (orange) mutant animals, along with transgenic  
810 animals expressing Pertussis Toxin (grey) or activated GOA-1<sup>Q205L</sup> (green) in HSN from the *tph-*  
811 *1* gene promoter. Intra-cluster intervals are operationally defined as those intervals between egg-  
812 laying events being <4 minutes while inter-cluster intervals are defined as those intervals  
813 between egg-laying events being >4 minutes duration. Asterisks indicate  $p < 0.0001$  (Kruskal-  
814 Wallis test with Dunn's correction for multiple comparisons).  $N \geq 10$  animals were analyzed per  
815 genotype. Total intra-cluster intervals (intervals <4 minutes) used for analysis in (A) for each  
816 strain were as follows: wildtype ( $n=188$ ), *goa-1(n1134)* mutants ( $n=36$ ), HSN::Pertussis toxin  
817 transgenic animals ( $n=24$ ), *egl-10(md176)* null mutants ( $n=161$ ), and HSN::GOA-1<sup>Q205L</sup>-  
818 transgenic animals ( $n=75$ ). Total inter-cluster intervals (intervals >4 minutes) used for analysis

819 in (B) for each strain were as follows: wildtype (n=77), hypomorphic *goa-1(n1134)* mutants  
820 (n=88), HSN::Pertussis toxin transgenic animals (n=79), *egl-10(md176)* null mutants (n=147),  
821 and HSN::GOA-1<sup>Q205L</sup> transgenic animals (n=56).

822

823

| <i>Genotype</i><br><i>Genotype</i>    | <i>Intra-cluster interval</i><br>(1/1 1)<br>Average (min)<br>(95%CI range) | <i>Inter-cluster interval</i><br>(1/1 2)<br>Average (min)<br>(95%CI range) | <i>Eggs laid per</i><br><i>per active</i><br><i>state</i><br>Average<br>± 95%CI | <i>Unlaid eggs</i><br><i>per animal</i><br>Average<br>± 95%CI |
|---------------------------------------|----------------------------------------------------------------------------|----------------------------------------------------------------------------|---------------------------------------------------------------------------------|---------------------------------------------------------------|
| <i>Wildtype</i>                       | 0.42<br>(0.33-0.51)                                                        | 22.11<br>(21.19-23.09)                                                     | 2.5 ± 0.5                                                                       | 15.9 ± 1.5                                                    |
| <i>goa-1(n1134)</i>                   | 1.31<br>(0.94-1.67)                                                        | 12.88*<br>(12.31-12.75)                                                    | 1.2 ± 0.1 <sup>‡</sup>                                                          | 2.2 ± 0.3                                                     |
| <i>HSN::Pertussis</i><br><i>Toxin</i> | 1.69<br>(1.17-2.20)                                                        | 12.42*<br>(12.09-12.75)                                                    | 1.1 ± 0.07 <sup>‡</sup>                                                         | 4.1 ± 0.3 <sup>##</sup>                                       |
| <i>egl-10(md176)</i>                  | 0.64<br>(0.49-0.79)                                                        | 258.6*<br>(231.26-293.42)                                                  | 2.5 ± 0.2                                                                       | 45.9 ± 3.3                                                    |
| <i>HSN::GOA-1<sup>Q205L</sup></i>     | 0.35<br>(0.24-0.47)                                                        | 66.97*<br>(64.14-70.02)                                                    | 2.2 ± 0.2                                                                       | 36.8 ± 3.8                                                    |

824

825 **Table 1. Egg-laying behavior measurements in animals with altered Gα<sub>o</sub> signaling.**

826 Long-term behavior recordings were used to extract features of egg-laying active and inactive  
827 behavior states for the indicated genotypes, as described (Figure 1-figure supplement 1)  
828 (Waggoner et al., 1998). Asterisks indicate significant differences compared to wildtype  
829 (p<0.0001, Kruskal-Wallis test with Dunn's correction for multiple comparisons). '‡' indicates  
830 significant differences compared to wildtype (p<0.0001, One-way ANOVA with Bonferroni  
831 correction). ## indicates that this result was previously reported (Tanis et al., 2008).

832

833

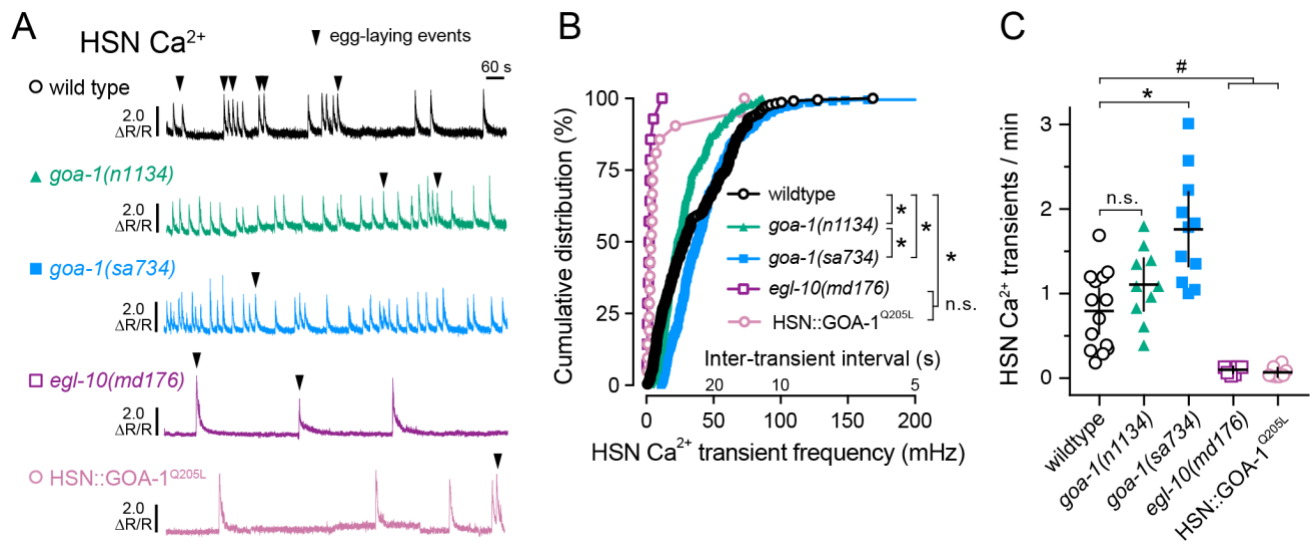

834

835 **Figure 2. Gα<sub>o</sub> signaling inhibits HSN neuron Ca<sup>2+</sup> activity and burst firing.**

836 (A) Representative GCaMP5:mCherry (ΔR/R) ratio traces showing HSN Ca<sup>2+</sup> activity in freely  
 837 behaving wild-type (black), *goa-1(n1134)* loss-of-function mutant (green), *goa-1(sa734)* null  
 838 mutant (blue), and *egl-10(md176)* null (purple) mutant animals, along with transgenic animals  
 839 expressing the activated GOA-1(Q205L) in the HSN neurons (pink) during an egg-laying active  
 840 state. Arrowheads indicate egg-laying events. (B) Cumulative distribution plots of instantaneous  
 841 Ca<sup>2+</sup> transient peak frequencies (and inter-transient intervals) in wild-type (black open circles),  
 842 *goa-1(n1134)* (green filled triangles), *goa-1(sa734)* (blue squares), *egl-10(md176)* mutants  
 843 (purple open squares) along with transgenic animals expressing the activated GOA-1(Q205L) in  
 844 the HSN neurons (pink open circles). Asterisks indicate p<0.0001 (Kruskal-Wallis test with  
 845 Dunn's correction for multiple comparisons). (C) Scatter plots show average Ca<sup>2+</sup> transient  
 846 frequency (per min) in wild-type (black open circles), *goa-1(n1134)* (green filled triangles), *goa-1(sa734)*  
 847 (blue filled squares), *egl-10(md176)* mutants (purple open circles), and transgenic  
 848 animals expressing GOA-1(Q205L) in the HSN neurons (pink open circles). Error bars indicate  
 849 95% confidence intervals for the mean. Asterisk indicates p<0.0001; pound (#) indicates  
 850 p≤0.0079; n.s. indicates p>0.05 (One-way ANOVA with Bonferroni correction for multiple  
 851 comparisons).



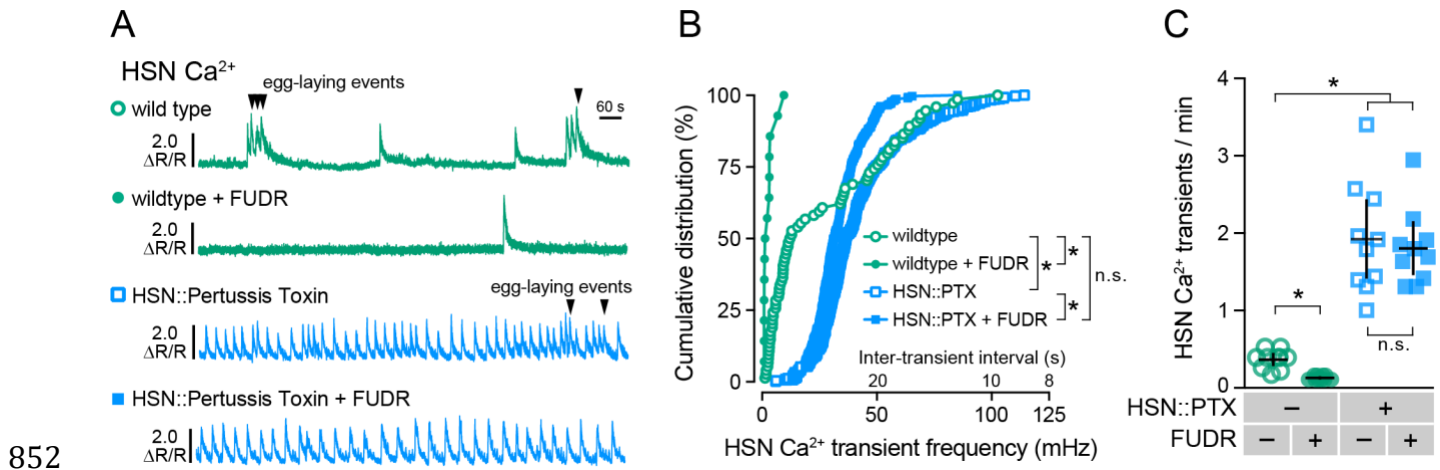

852

853 **Figure 3. Inhibitory  $\text{G}\alpha_o$  signaling in HSN is required for two-state  $\text{Ca}^{2+}$  activity and**  
 854 **facilitates modulation by the homeostat.**

855 **(A)** Representative GCaMP5:mCherry ( $\Delta R/R$ ) ratio traces showing HSN  $\text{Ca}^{2+}$  activity in  
 856 untreated fertile wild-type animals (green, top), FUDR-sterilized wild-type animals (green,  
 857 bottom), untreated fertile animals expressing Pertussis Toxin (PTX) in the HSN neurons (blue,  
 858 top), and in FUDR-sterilized transgenic animals expressing PTX in the HSNs (blue, bottom).  
 859 Arrowheads indicate egg-laying events. **(B)** Cumulative distribution plots of instantaneous  $\text{Ca}^{2+}$   
 860 transient peak frequencies (and inter-transient intervals) in untreated (open circles) and FUDR-  
 861 treated (filled circles) wild-type control (blue) and Pertussis Toxin expressing transgenic animals  
 862 (green). Asterisks indicate  $p < 0.0001$  (Kruskal-Wallis test with Dunn's test for multiple  
 863 comparisons). **(C)** Scatter plots show average  $\text{Ca}^{2+}$  transient frequency (per min) in untreated  
 864 (open circles) and FUDR-treated (filled circles) wild-type control (blue) and Pertussis Toxin  
 865 expressing transgenic animals (green). Error bars indicate 95% confidence intervals for the  
 866 mean. Asterisks indicate  $p < 0.0001$  (One-way ANOVA with Bonferroni's test for multiple  
 867 comparisons). Data from 10 animals were used for each strain for analysis.

868

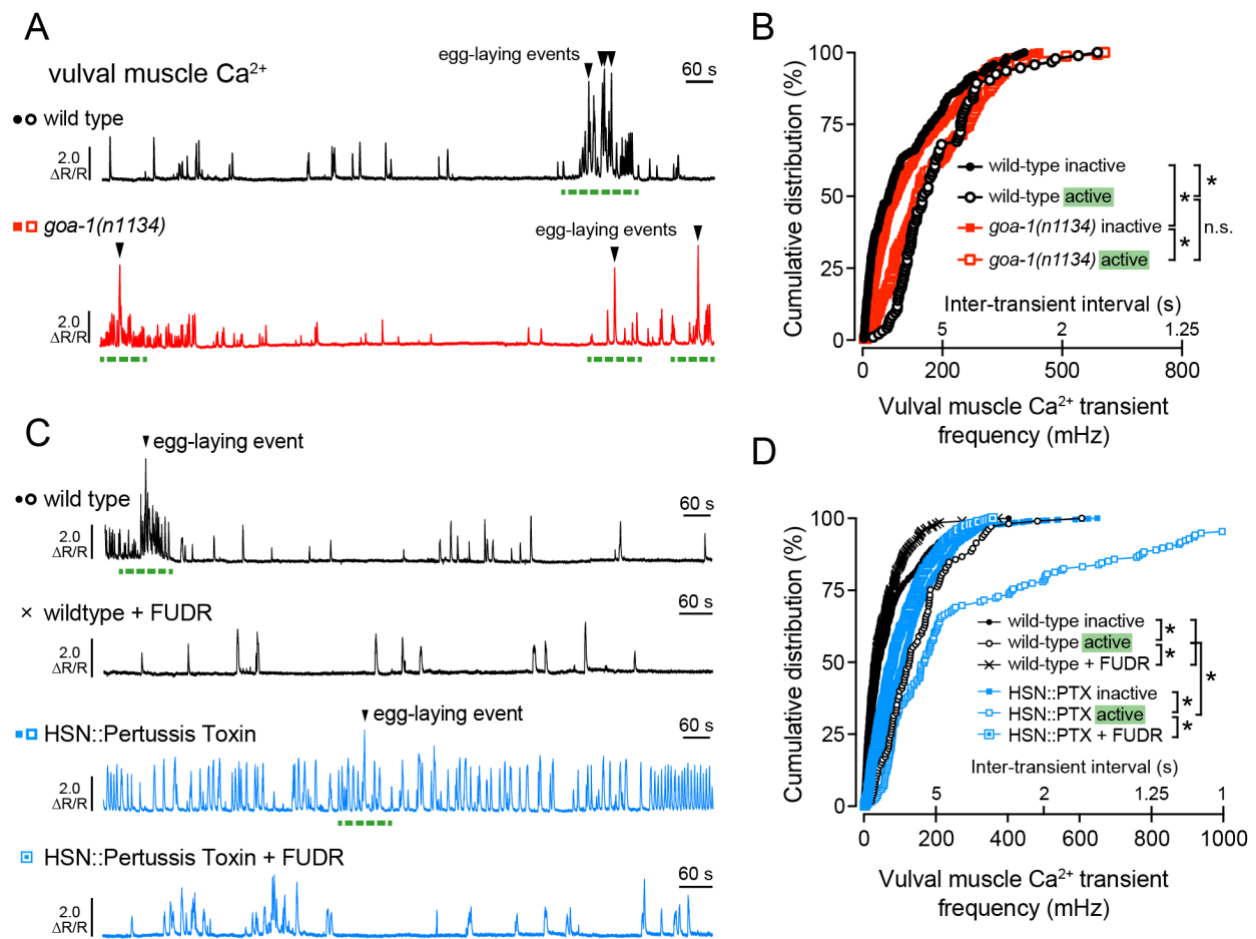

869

870

871 **Figure 4.  $\text{G}\alpha_o$  signals in HSN to reduce excitatory modulation of the vulval muscles.**

872 **(A)** Representative GCaMP5:mCherry ( $\Delta R/R$ ) ratio traces showing vulval muscle  $\text{Ca}^{2+}$  activity

873 in wild-type (black) and *goa-1(n1134)* loss-of-function mutant animals (red). Egg-laying events

874 are indicated by arrowheads, and egg-laying active states are indicated by dashed green lines.

875 **(B)** Cumulative distribution plots of instantaneous vulval muscle  $\text{Ca}^{2+}$  transient peak frequencies

876 (and inter-transient intervals) in wild-type (black circles) and *goa-1(n1134)* mutant animals (red

877 squares) in the egg-laying inactive and active states (filled and open, respectively). **(C)**

878 Representative GCaMP5:mCherry ( $\Delta R/R$ ) ratio traces showing vulval muscle  $\text{Ca}^{2+}$  activity in

879 untreated (circles) and FUDR-treated (cross) wild-type animals (black) along with untreated

880 (filled) or FUDR-treated (open) transgenic animals expressing Pertussis Toxin in the HSNs (blue

881 squares). Egg-laying events are indicated by arrowheads, and egg-laying active states are  
882 indicated by green dashed lines. **(D)** Cumulative distribution plots of instantaneous vulval muscle  
883  $\text{Ca}^{2+}$  transient peak frequencies (and inter-transient intervals) in wildtype and in transgenic  
884 animals expressing Pertussis Toxin in the HSN neurons. Asterisks indicate  $p < 0.0001$  (Kruskal-  
885 Wallis test with Dunn's test for multiple comparisons).

886

887

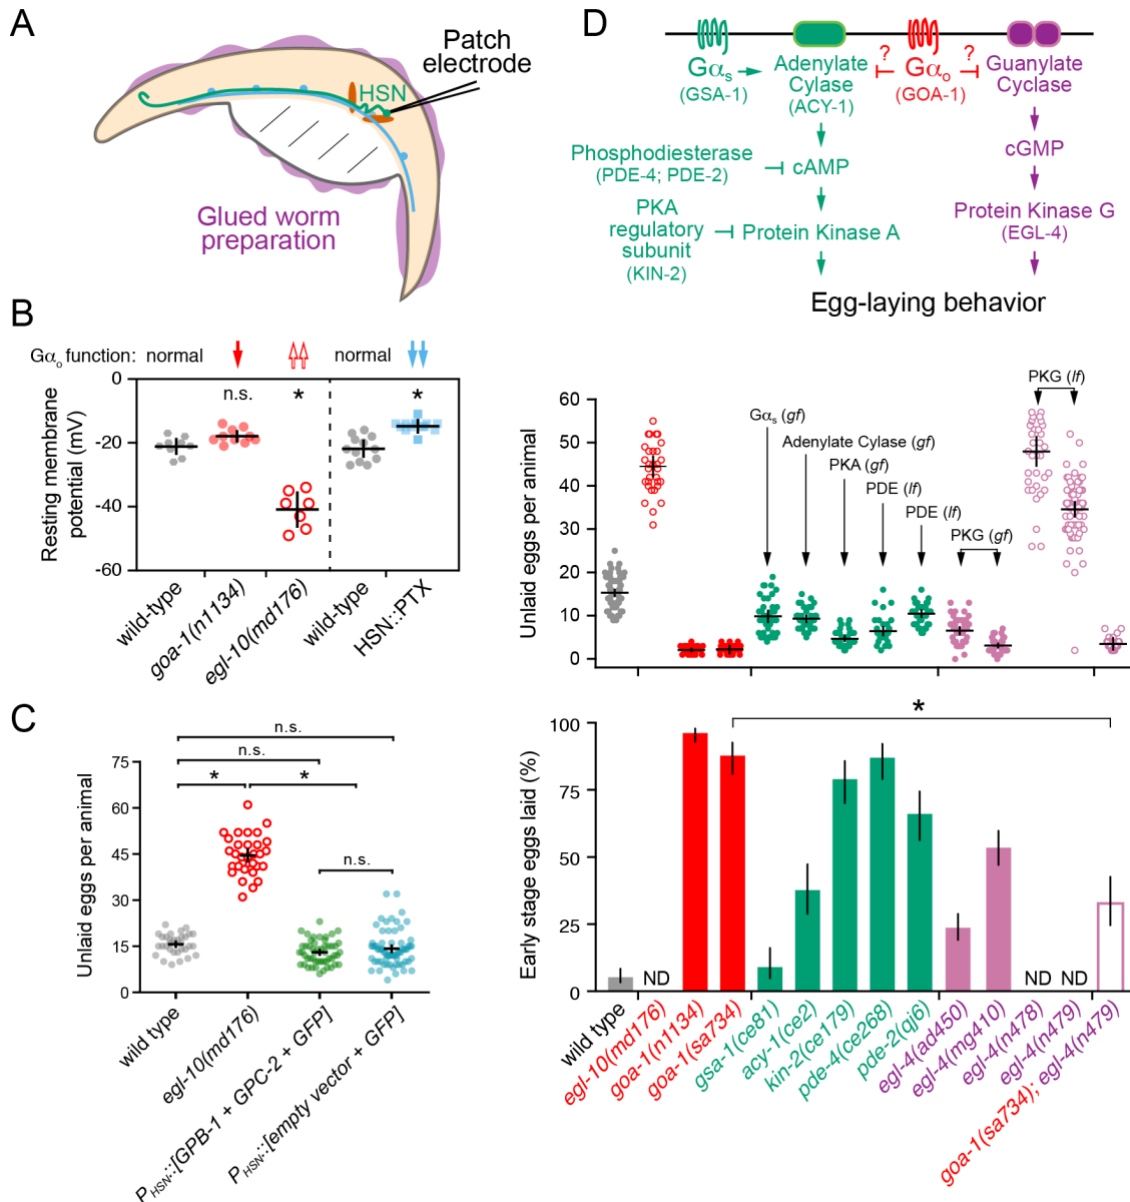

888

889 **Figure 5.  $G\alpha_o$  depresses HSN resting membrane potential and may regulate egg-laying**  
890 **behavior via modulation of cGMP and cAMP signaling pathways.**

891 (A) Cartoon of the ‘fileted’ worm preparation used for patch clamp electrophysiology of HSN. (B)  
892 Scatter plots show resting membrane potential of wild-type control animals (grey circles), *goa-1*(*n1134*)  
893 *1(n1134)* loss-of-function mutants (red filled circles), *egl-10(md176)* null mutants (red open  
894 circles), and in transgenic animals expressing Pertussis Toxin in HSN (blue filled squares). Error  
895 bars indicate 95% confidence intervals for the mean. Asterisks indicate  $p < 0.0001$  (One-Way

896 ANOVA with Bonferroni correction for multiple comparisons).  $N \geq 7$  animals recorded per  
897 genotype. **(C)** Scatter plots show average number of eggs retained by wild-type animals (gray  
898 filled circles), *egl-10(md176)* null mutants (orange open circles), and in transgenic animals  
899 expressing either  $G\beta$  (GPB-2) and  $G\gamma$  (GPC-1) subunits (green filled circles) or nothing (blue  
900 filled circles) from the *tph-1* gene promoter along with GFP. Error bars indicate means with 95%  
901 confidence intervals. Asterisk indicates  $p < 0.0001$ ; n.s. indicates  $p > 0.05$  (One-Way ANOVA with  
902 Bonferroni correction for multiple corrections). **(D)** Top, cartoon of cAMP and cGMP signaling  
903 pathways and how they might be inhibited by  $G\alpha_o$  signaling. Gene names for *C. elegans*  
904 orthologs tested here are indicated in parentheses. Middle, scatterplots show average number  
905 of eggs retained by wildtype (grey), *egl-10(md176)* (red open circles), *goa-1(n1134)* and *goa-*  
906 *1(sa734)*  $G\alpha_o$  loss of function (red filled circles) mutants, and in animals with altered cAMP  
907 effector signaling (green): *gsa-1(ce81)*  $G\alpha_s$  gain-of-function, *acy-1(ce2)* Adenylate Cyclase  
908 gain-of-function, *kin-2(ce179)* Protein Kinase A (PKA) inhibitory regulatory subunit loss-of-  
909 function, *pde-4(ce268)* Phosphodiesterase (PDE) loss-of-function, *pde-2(qj6)*  
910 Phosphodiesterase (PDE) null; altered cGMP effector signaling (pink): *egl-4(ad805)* and *egl-*  
911 *4(mg410)* Protein Kinase G (PKG) gain-of-function (pink filled circles), *egl-4(n478)* and *egl-*  
912 *4(n479)* loss-of-function mutants (pink open circles). Bottom, bar graphs indicate percent of  
913 embryos laid at early stages of development. N.D. indicates the stages of eggs laid was not  
914 determined because those mutants are egg-laying defective (Egl). Error bars indicate 95%  
915 confidence intervals for the mean. Asterisk indicates highlighted significant differences  
916 ( $p \leq 0.0001$ ; Fisher Exact Test).

917

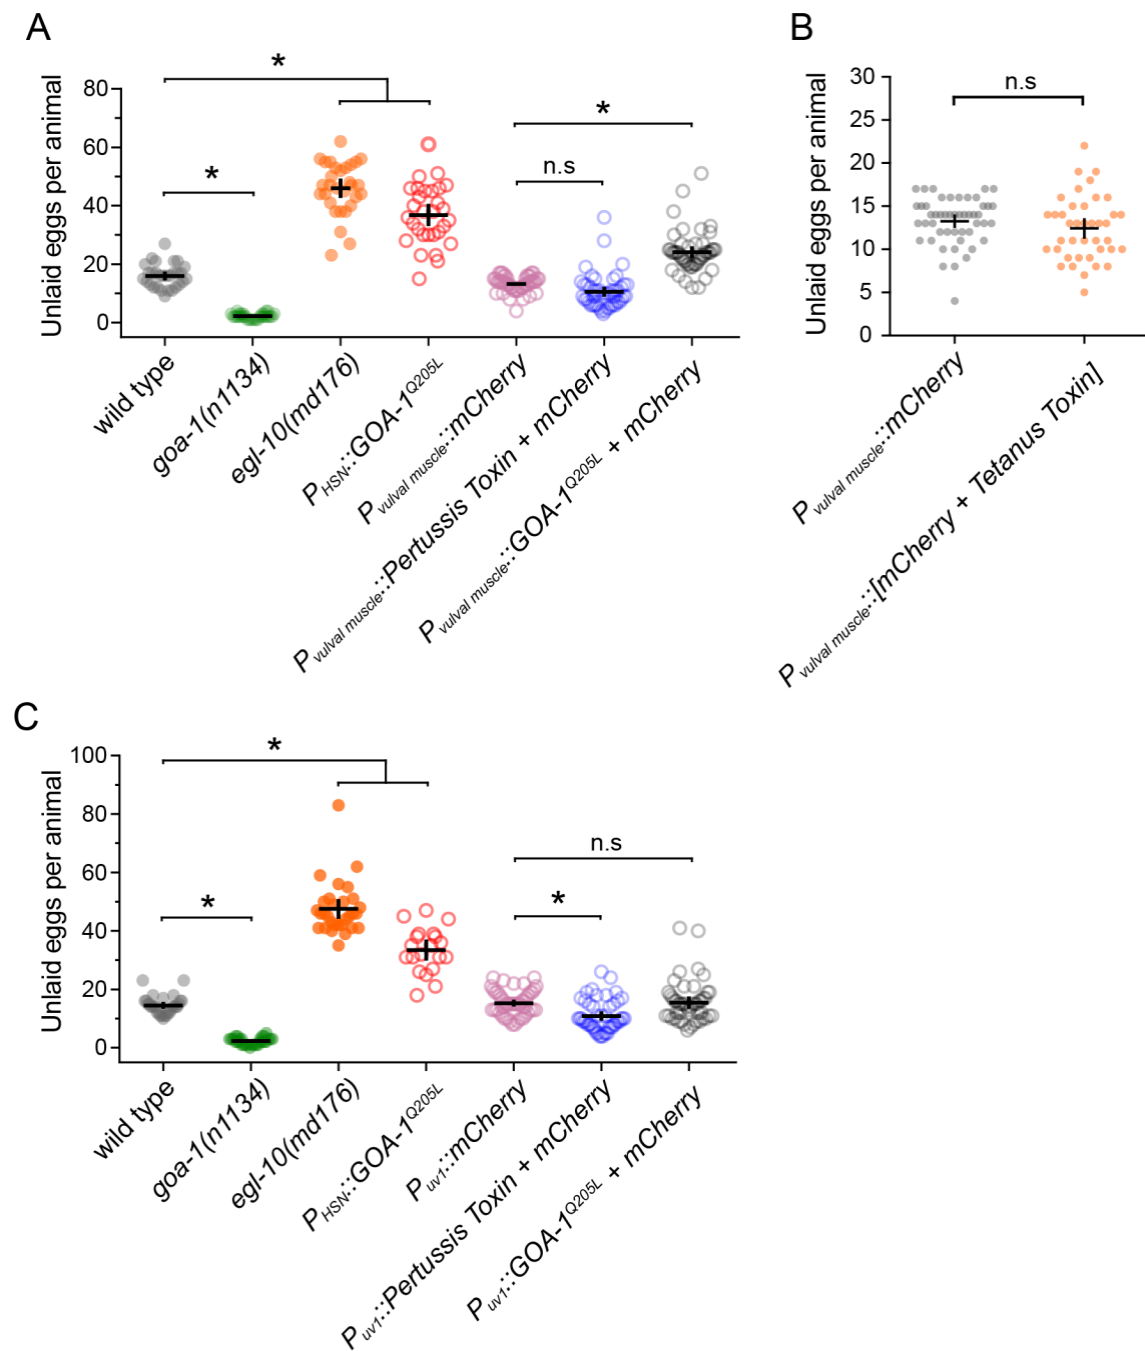

918

919 **Figure 5–supplemental figure 1.  $G\alpha_o$  signaling in the vulval muscles and *uv1***  
 920 **neuroendocrine cells also regulates egg laying.**

921 **(A)** Scatter plots show average number of eggs retained by wild-type (grey), *goa-1(n1134)*  
 922 mutants (green), *egl-10(md176)* null mutant animals (orange) along with transgenic animals  
 923 expressing  $GOA-1^{Q205L}$  in the HSNs (red open circles), transgenic animals expressing mCherry

924 (pink open circles), Pertussis Toxin (blue open circles), or GOA-1<sup>Q205L</sup> (black open circles) in the  
925 vulval muscles from the *ceh-24* gene promoter. **(B)** Scatter plots show average number of eggs  
926 retrained in transgenic animals expressing only mCherry (gray) or Tetanus Toxin along with  
927 mCherry (orange) in the vulval muscles using the *ceh-24* gene promoter. Error bars indicate  
928 means with 95% confidence intervals. P=0.2197 (Student's t test). **(C)** Scatter plots show  
929 average number of eggs retained by wild-type (grey), *goa-1(n1134)* mutant (green), *egl-*  
930 *10(md176)* null mutant (orange) animals along with transgenic animals expressing GOA-1<sup>Q205L</sup>  
931 in the HSNs (red), transgenic animals expressing mCherry (pink), Pertussis Toxin (blue), or  
932 GOA-1<sup>Q205L</sup> (black open circles) in the uv1 neuroendocrine cells from the *tdc-1* gene promoter.  
933 Four or five independent extrachromosomal arrays were generated for each transgene in **(A-C)**  
934 and ~10 animals from each extrachromosomal array were used. Error bars indicate 95%  
935 confidence intervals for the mean. Asterisks indicate p<0.0001 (One-Way ANOVA with  
936 Bonferroni's correction for multiple comparisons).

937

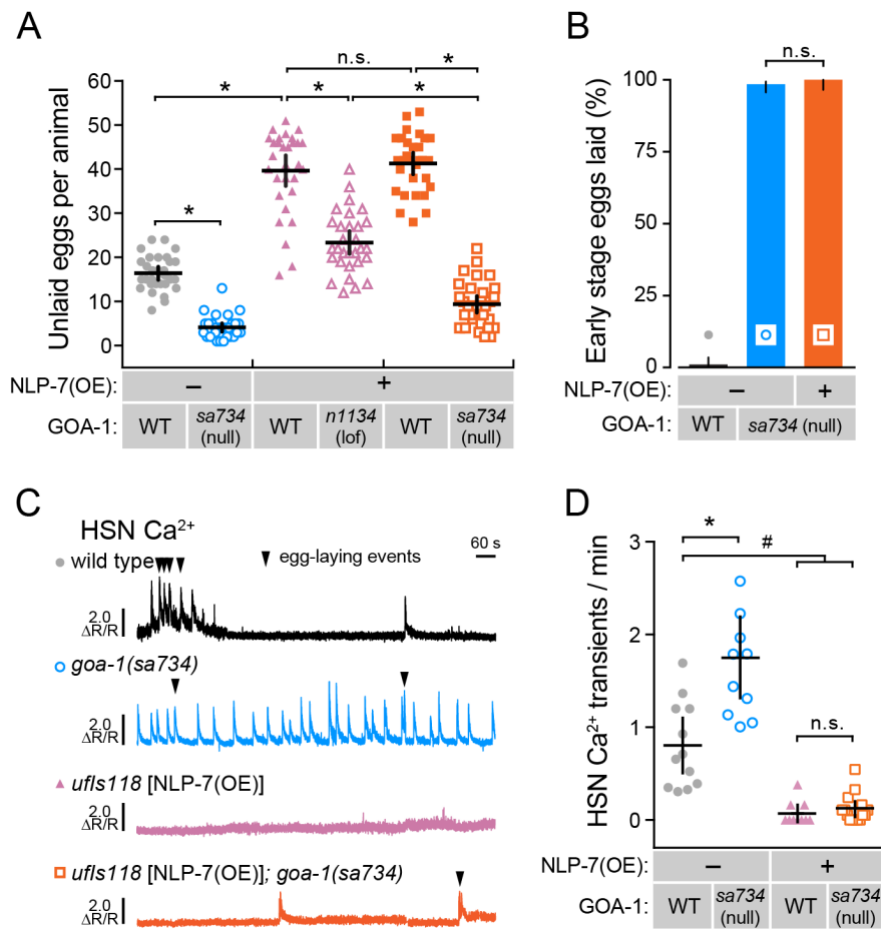

938

939

**Figure 6. NLP-7 neuropeptides signal through  $G\alpha_o$  to inhibit egg-laying independent of the HSN neurons**

940

941

**(A)** NLP-7 signals through  $G\alpha_o$  to suppress egg laying. Scatter plots show average number of

942

eggs retained by wild-type (gray circles), *goa-1(sa734)* mutants (blue open circles), NLP-7 over-

943

expressing transgenics in the wild-type (pink triangles, orange squares), and in NLP-7 over-

944

expressing transgenics in the *goa-1(n1134)* (pink open triangles) and *goa-1(sa734)* null mutant

945

background (orange open squares). Data in orange squares are from animals that also carry the

946

*vs/s183* transgene used for HSN  $Ca^{2+}$  imaging. Error bars indicate 95% confidence intervals for

947

the mean. Asterisk indicates  $p < 0.0001$  (One-Way ANOVA with Bonferroni correction for multiple

948

comparisons).  $N \geq 30$  animals for each strain **(B)** Measure of hyperactive egg laying in wild-type

949

(black), *goa-1(sa734)* null mutants (blue), and *goa-1(sa734)* null mutants over-expressing NLP-



950 7 neuropeptides (orange). Both *goa-1(sa734)* mutant strains also carry the *vs/s183* transgene  
951 used for HSN Ca<sup>2+</sup> imaging. **(C)** NLP-7 over-expression silences HSN Ca<sup>2+</sup> activity.  
952 Representative GCaMP5/mCherry ratio traces showing HSN Ca<sup>2+</sup> activity in wild-type (black),  
953 *goa-1(sa734)* null mutants, and NLP-7 overexpressing transgenic animals in the wild-type (pink)  
954 and *goa-1(sa734)* null mutant backgrounds (orange). Arrowheads indicate egg-laying events **(D)**  
955 Scatter plots show HSN Ca<sup>2+</sup> peaks per minute measurements for each individual in wild type  
956 (black), *goa-1(sa734)* null mutants, and NLP-7 over-expressing animals in the wild-type (pink)  
957 and *goa-1(sa734)* null mutant backgrounds (orange). Error bars indicate 95% confidence  
958 intervals for the mean for N≥10 animals; asterisk indicates p≤0.0001, pound sign indicates  
959 p≤0.0007, and n.s. indicates p>0.05 (one-way ANOVA with Bonferroni correction for multiple  
960 comparisons).

961

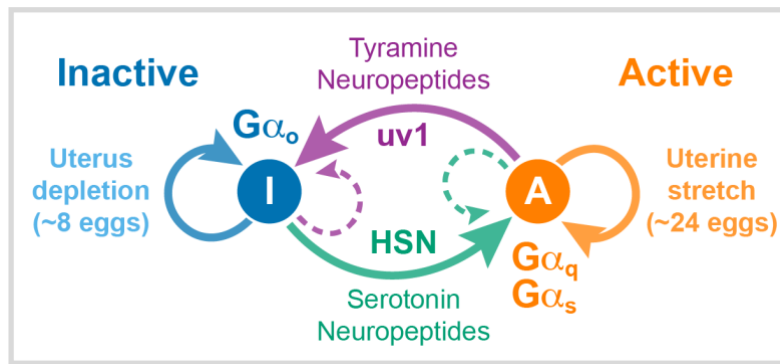

962

963 **Figure 7. Model for how  $G\alpha_o$  signaling acts to inhibit HSN neurotransmitter release and**  
964 **prolong the egg-laying inactive state.** Serotonin and NLP-3 neuropeptides released from HSN  
965 (filled green arrow) signal through excitatory receptors coupled to  $G\alpha_q$  and  $G\alpha_s$  to promote vulval  
966 muscle electrical excitability and the egg-laying active state (A). Feedback of egg accumulation  
967 in the uterus maintains the active state (filled orange arrow). Retrograde feedback of ongoing  
968 vulval muscle  $Ca^{2+}$  activity (dashed green arrow) also drives burst firing in the HSNs which  
969 further maintains the circuit in the active state. Egg release mechanically activates the uv1  
970 neuroendocrine cells which release tyramine, NLP-7, and FLP-11 neuropeptides (filled purple  
971 arrow) which signal through inhibitory receptors and  $G\alpha_o$  to promote the inactive state (I). Not  
972 shown are other inhibitory neuropeptides released from sensory neurons in response to aversive  
973 environmental conditions that also signal to activate inhibitory receptors and  $G\alpha_o$ . Feedback of  
974 egg depletion from the uterus maintains the inactive state (filled blue arrow). Vulval openings  
975 that fail to release eggs may feedback and prolong  $Ca^{2+}$  signaling in the uv1 cells and VC  
976 neurons (dashed purple arrow) which further signal to reduce the probability of the circuit leaving  
977 the inactive state.

978

979 **Video 1.** GCaMP5:mCherry ratio recording of HSN Ca<sup>2+</sup> activity in a control, wild-type adult  
980 animal during an egg-laying active state. High Ca<sup>2+</sup> is indicated in red while low calcium is in  
981 blue. Head is at left, tail is at right.

982 **Video 2.** GCaMP5:mCherry ratio recording of HSN Ca<sup>2+</sup> activity in a *goa-1(n1134)* mutant adult  
983 animal during an egg-laying active state. High Ca<sup>2+</sup> is indicated in red while low calcium is in  
984 blue. Head is at left, tail is at right.

985 **Video 3.** GCaMP5:mCherry ratio recording of HSN Ca<sup>2+</sup> activity in a *goa-1(sa734)* null mutant  
986 adult animal during an egg-laying active state. High Ca<sup>2+</sup> is indicated in red while low calcium is  
987 in blue. Head is at right, tail is at left.

988 **Video 4.** GCaMP5:mCherry ratio recording of HSN Ca<sup>2+</sup> activity in an wild-type adult animal  
989 during an egg-laying active state. High Ca<sup>2+</sup> is indicated in red while low calcium is in blue. Head  
990 is at top, tail is at bottom.

991 **Video 5.** GCaMP5:mCherry ratio recording of HSN Ca<sup>2+</sup> activity in a transgenic adult animal  
992 expressing Pertussis Toxin in the HSNs from the *tph-1* gene promoter during an egg-laying  
993 active state. High Ca<sup>2+</sup> is indicated in red while low calcium is in blue. Head is at top, tail is at  
994 bottom.

995 **Video 6.** GCaMP5:mCherry ratio recording of vulval muscle Ca<sup>2+</sup> activity in a control wild-type  
996 adult animal during an egg-laying active state. High Ca<sup>2+</sup> is indicated in red while low calcium is  
997 in blue. Head is at right, tail is at top.

998 **Video 7.** GCaMP5:mCherry ratio recording of vulval muscle Ca<sup>2+</sup> activity in a *goa-1(n1134)*  
999 mutant adult animal during an egg-laying active state. High Ca<sup>2+</sup> is indicated in red while low  
1000 calcium is in blue. Head is at right, tail is at left.

1001 **Video 8.** GCaMP5:mCherry ratio recording of vulval muscle  $\text{Ca}^{2+}$  activity in a control wild-type  
1002 adult animal during an egg-laying active state. High  $\text{Ca}^{2+}$  is indicated in red while low calcium is  
1003 in blue. Head is at top, tail is at bottom.

1004 **Video 9.** GCaMP5:mCherry ratio recording of vulval muscle  $\text{Ca}^{2+}$  activity in a transgenic adult  
1005 animal expressing Pertussis Toxin in the HSNs from the *tph-1* gene promoter during an egg-  
1006 laying active state. High  $\text{Ca}^{2+}$  is indicated in red while low calcium is in blue. Head is at left, tail  
1007 is at right.

1008

1009

1010

1011

1012

1013

1014

1015

1016

1017

1018 **Table 2. Strain names and genotypes for all animals used in this study (behavior assays and**  
 1019 **calcium imaging)**

1020

| Strain | Feature                                                                                                                                                                   | Genotype                                                                       | Reference                   |
|--------|---------------------------------------------------------------------------------------------------------------------------------------------------------------------------|--------------------------------------------------------------------------------|-----------------------------|
| LX1832 | Strain for transgene production, blue-light insensitive, multi-vulva at 20°C in the absence of <i>lin-15(+)</i> rescue transgene.                                         | <i>lite-1(ce314) lin-15(n765ts) X</i>                                          | (Gurel et al., 2012)        |
| N2     | Bristol wild-type strain                                                                                                                                                  | wild type                                                                      | (Brenner, 1974)             |
| LX2004 | HSN GCaMP5, mCherry                                                                                                                                                       | <i>vsIs183 lite-1(ce314) lin-15(n765ts) X</i>                                  | (Collins et al., 2016)      |
| LX1918 | vulval muscle GCaMP5, mCherry                                                                                                                                             | <i>vsIs164 lite-1(ce314) lin-15(n765ts) X</i>                                  | (Collins et al., 2016)      |
| MT2426 | <i>goa-1(Gα<sub>o</sub>)</i> reduced-function mutant, hyperactive egg laying                                                                                              | <i>goa-1(n1134) I</i>                                                          | (Segalat et al., 1995)      |
| DG1856 | <i>goa-1(Gα<sub>o</sub>)</i> null mutant, hyperactive egg laying                                                                                                          | <i>goa-1(sa734) I</i>                                                          | (Robatzek and Thomas, 2000) |
| LX850  | HSN and NSM Pertussis Toxin, hyperactive egg laying                                                                                                                       | <i>vsIs50; lin-15(n765ts)</i>                                                  | (Tanis et al., 2008)        |
| LX849  | HSN and NSM activated GOA-1(Q205L), egg laying defective                                                                                                                  | <i>vsIs49; lin-15(n765ts)</i>                                                  | (Tanis et al., 2008)        |
| MT8504 | Increased Gα <sub>o</sub> signaling due to mutation in RGS protein, EGL-10                                                                                                | <i>egl-10(md176)</i>                                                           | (Koelle and Horvitz, 1996)  |
| MIA220 | <i>goa-1(Gα<sub>o</sub>)</i> reduced-function mutant in <i>lite-1(ce314)</i> , <i>lin-15(n765ts)</i> background to facilitate strain construction, hyperactive egg laying | <i>goa-1(n1134) I; lite-1(ce314) lin-15(n765ts) X</i>                          | this study                  |
| MIA210 | <i>goa-1(Gα<sub>o</sub>)</i> reduced-function mutant; HSN GCaMP, mCherry                                                                                                  | <i>goa-1(n1134) I; vsIs183 lite-1(ce314) lin-15(n765ts) X</i>                  | this study                  |
| MIA263 | <i>goa-1(Gα<sub>o</sub>)</i> null mutant; HSN GCaMP5, mCherry                                                                                                             | <i>goa-1(sa734) I; vsIs183 lite-1(ce314) lin-15(n765ts) X</i>                  | this study                  |
| MIA216 | Increased Gα <sub>o</sub> signaling; HSN GCaMP5, mCherry                                                                                                                  | <i>egl-10(md176) V; vsIs183 lite-1(ce314) lin-15(n765ts) X</i>                 | this study                  |
| MIA277 | Increased Gα <sub>o</sub> signaling in HSN; HSN GCaMP5, mCherry                                                                                                           | <i>vsIs49/+, +/vsIs183 lite-1(ce314) lin-15(n765ts) X (trans-heterozygote)</i> | this study                  |
| LX2007 | HSN GCaMP5, mCherry                                                                                                                                                       | <i>vsIs186 lite-1(ce314) lin-15(n765ts) X</i>                                  | (Collins et al., 2016)      |

|        |                                                                                             |                                                                |                         |
|--------|---------------------------------------------------------------------------------------------|----------------------------------------------------------------|-------------------------|
| MIA218 | HSN and NSM Pertussis Toxin in blue-light insensitive, <i>lin-15</i> multi-vulva background | <i>vsIs50 lite-1(ce314) lin-15(n765ts) X</i>                   | this study              |
| MIA227 | HSN and NSM Pertussis Toxin; HSN GCaMP5, mCherry                                            | <i>vsIs186; vsIs50 lite-1(ce314) lin-15(n765ts) X</i>          | this study              |
| MIA214 | <i>goa-1(Gα<sub>o</sub>)</i> reduced-function mutant; vulval muscle GCaMP5, mCherry         | <i>goa-1(n1134) I; vsIs164 lite-1(ce314) lin-15(n765ts) X</i>  | this study              |
| LX1919 | Vulval muscle GCaMP5, mCherry                                                               | <i>vsIs165; lite-1(ce314) lin-15(n765ts) X</i>                 | (Collins et al., 2016)  |
| MIA245 | <i>goa-1(Gα<sub>o</sub>)</i> null-function mutant; vulval muscle GCaMP5, mCherry            | <i>vsIs50 X vsIs165; lite-1(ce314) lin-15(n765ts) X</i>        | this study              |
| MIA295 | <i>goa-1(Gα<sub>o</sub>)</i> null mutant, vulval muscles GCaMP, mCherry                     | <i>goa-1(sa734) I; vsIs164 lite-1(ce314) lin-15(n765ts) X</i>  | this study              |
| MIA291 | Increased Gα <sub>o</sub> signaling in HSN; HSN GCaMP5, mCherry                             | <i>vsIs49; vsIs165 lite-1(ce314) lin-15(n765ts) X</i>          | this study              |
| MIA290 | Increased Gα <sub>o</sub> signaling; vulval muscle GCaMP5, mCherry                          | <i>egl-10(md176) V; vsIs183 lite-1(ce314) lin-15(n765ts) X</i> | this study              |
| MIA256 | Vulval muscle mCherry ( <i>ceh-24</i> promoter)                                             | <i>keyEx45; lite-1(ce314) lin-15(n765ts) X</i>                 | this study              |
| MIA257 | Vulval muscle mCherry + Pertussis Toxin ( <i>ceh-24</i> promoter)                           | <i>keyEx46; lite-1(ce314) lin-15(n765ts) X</i>                 | this study              |
| MIA258 | Vulval muscle mCherry + Activated GOA-1(Q205L) ( <i>ceh-24</i> promoter)                    | <i>keyEx47; lite-1(ce314) lin-15(n765ts) X</i>                 | this study              |
| MIA262 | Vulval muscle mCherry + Tetanus toxin ( <i>ceh-24</i> promoter)                             | <i>keyEx51; lite-1(ce314) lin-15(n765ts)</i>                   | this study              |
| MIA259 | uv1 cells mCherry ( <i>tdc-1</i> promoter, <i>ocr-2</i> 3' UTR)                             | <i>keyEx48; lite-1(ce314) lin-15(n765ts) X</i>                 | this study              |
| MIA260 | uv1 cells mCherry + Pertussis Toxin ( <i>tdc-1</i> promoter, <i>ocr-2</i> 3' UTR)           | <i>keyEx49; lite-1(ce314) lin-15(n765ts) X</i>                 | this study              |
| MIA261 | uv1 cells mCherry + Activated GOA-1(Q205L) ( <i>tdc-1</i> promoter, <i>ocr-2</i> 3' UTR)    | <i>keyEx50; lite-1(ce314) lin-15(n765ts) X</i>                 | this study              |
| MIA278 | HSN/NSM <i>gpb-1</i> and <i>gpc-2</i> overexpression + GFP ( <i>tph-1</i> promoter)         | <i>keyEx52; lite-1(ce314) lin-15(n765ts) X</i>                 | this study              |
| MIA279 | HSN/NSM empty + GFP ( <i>tph-1</i> promoter)                                                | <i>keyEx53; lite-1(ce314) lin-15(n765ts) X</i>                 | this study              |
| KG421  | GSA-1(Gα <sub>s</sub> ) gain-of-function mutant. Hyperactive locomotion                     | <i>gsa-1(ce81) I</i>                                           | (Schade et al., 2005)   |
| MT1073 | EGL-4 (Protein Kinase G) null mutant. Egg-laying defective, roaming locomotion              | <i>egl-4(n479) IV</i>                                          | (L'Etoile et al., 2002) |

|        |                                                                                                           |                                                                        |                                      |
|--------|-----------------------------------------------------------------------------------------------------------|------------------------------------------------------------------------|--------------------------------------|
| MT1074 | EGL-4 (Protein Kinase G) loss-of-function mutant. Egg-laying defective, roaming locomotion                | <i>egl-4(n478) IV</i>                                                  | (L'Etoile et al., 2002)              |
| DA521  | EGL-4 (Protein Kinase G) gain-of-function mutant. Hyperactive egg laying, sluggish locomotion             | <i>egl-4(ad805) IV</i>                                                 | (Raizen et al., 2006)                |
| MIA36  | EGL-4 (Protein Kinase G) gain-of-function mutant. Hyperactive egg laying, sluggish locomotion             | <i>egl-4(mg410) IV</i>                                                 | (Hao et al., 2011)                   |
| KG518  | ACY-1 (Adenylate Cyclase) gain-of-function mutant. Hyperactive locomotion                                 | <i>acy-1(ce2) III</i>                                                  | (Schade et al., 2005)                |
| KG532  | KIN-2 (Protein Kinase A inhibitory regulatory subunit) loss-of-function mutant. Hypersensitive to stimuli | <i>kin-2(ce179) X</i>                                                  | (Schade et al., 2005)                |
| KG744  | PDE-4 (phosphodiesterase) loss-of-function mutant, Hyperactive locomotion                                 | <i>pde-4(ce268) II</i>                                                 | (Charlie et al., 2006b)              |
| MIA282 | PDE-2 (phosphodiesterase) loss-of-function mutant                                                         | <i>pde-2(qj6)</i>                                                      | (Fujiwara et al., 2015)              |
| MIA293 | NLP-7 overexpression; HSN GCaMP5, mCherry                                                                 | <i>ufls118; vsIs183 lite-1(ce314) lin-15(n765ts) X</i>                 | (Banerjee et al., 2017) & this study |
| MIA294 | NLP-7 overexpression; <i>goa-1(G<math>\alpha_o</math>)</i> null mutant; HSN GCaMP5, mCherry               | <i>ufls118; goa-1(sa734) I; vsIs183 lite-1(ce314) lin-15(n765ts) X</i> | (Banerjee et al., 2017) & this study |

1021

## 1022 References

- 1023 Alkema MJ, Hunter-Ensor M, Ringstad N, Horvitz HR (2005) Tyramine Functions independently of  
1024 octopamine in the *Caenorhabditis elegans* nervous system. *Neuron* 46:247-260.
- 1025 Banerjee N, Bhattacharya R, Gorczyca M, Collins KM, Francis MM (2017) Local neuropeptide  
1026 signaling modulates serotonergic transmission to shape the temporal organization of *C.*  
1027 *elegans* egg-laying behavior. *PLoS Genet* 13:e1006697.
- 1028 Bastiani CA, Gharib S, Simon MI, Sternberg PW (2003) *Caenorhabditis elegans* Galphaq regulates  
1029 egg-laying behavior via a PLCbeta-independent and serotonin-dependent signaling  
1030 pathway and likely functions both in the nervous system and in muscle. *Genetics* 165:1805-  
1031 1822.
- 1032 Bellemer A, Hirata T, Romero MF, Koelle MR (2011) Two types of chloride transporters are  
1033 required for GABA(A) receptor-mediated inhibition in *C. elegans*. *EMBO J* 30:1852-1863.
- 1034 Brenner S (1974) The genetics of *Caenorhabditis elegans*. *Genetics* 77:71-94.
- 1035 Brewer JC, Collins KM, Koelle MR, Olsen A (2019) Serotonin and neuropeptides are both released  
1036 by the HSN command neuron to initiate *C. elegans* egg laying. *PLoS Genet* 15.
- 1037 Brundage L, Avery L, Katz A, Kim UJ, Mendel JE, Sternberg PW, Simon MI (1996) Mutations in a *C.*  
1038 *elegans* Galpha gene disrupt movement, egg laying, and viability. *Neuron* 16:999-1009.
- 1039 Carnell L, Illi J, Hong SW, McIntire SL (2005) The G-protein-coupled serotonin receptor SER-1  
1040 regulates egg laying and male mating behaviors in *Caenorhabditis elegans*. *J Neurosci*  
1041 25:10671-10681.
- 1042 Charlie NK, Thomure AM, Schade MA, Miller KG (2006a) The Dunce cAMP phosphodiesterase PDE-  
1043 4 negatively regulates G alpha(s)-dependent and G alpha(s)-independent cAMP pools in the  
1044 *Caenorhabditis elegans* synaptic signaling network. *Genetics* 173:111-130.
- 1045 Charlie NK, Schade MA, Thomure AM, Miller KG (2006b) Presynaptic UNC-31 (CAPS) is required to  
1046 activate the G alpha(s) pathway of the *Caenorhabditis elegans* synaptic signaling network.  
1047 *Genetics* 172:943-961.
- 1048 Chase DL, Pepper JS, Koelle MR (2004) Mechanism of extrasynaptic dopamine signaling in  
1049 *Caenorhabditis elegans*. *Nat Neurosci* 7:1096-1103.
- 1050 Chew YL, Grundy LJ, Brown AEX, Beets I, Schafer WR (2018) Neuropeptides encoded by nlp-49  
1051 modulate locomotion, arousal and egg-laying behaviours in *Caenorhabditis elegans* via the  
1052 receptor SEB-3. *Philos Trans R Soc Lond B Biol Sci* 373.
- 1053 Clancy SM, Fowler CE, Finley M, Suen KF, Arrabit C, Berton F, Kosaza T, Casey PJ, Slesinger PA  
1054 (2005) Pertussis-toxin-sensitive Galpha subunits selectively bind to C-terminal domain of  
1055 neuronal GIRK channels: evidence for a heterotrimeric G-protein-channel complex. *Mol Cell*  
1056 *Neurosci* 28:375-389.
- 1057 Coleman B, Topalidou I, Ailion M (2018) Modulation of Gq-Rho Signaling by the ERK MAPK  
1058 Pathway Controls Locomotion in *Caenorhabditis elegans*. *Genetics* 209:523-535.
- 1059 Collins KM, Koelle MR (2013) Postsynaptic ERG potassium channels limit muscle excitability to  
1060 allow distinct egg-laying behavior states in *Caenorhabditis elegans*. *J Neurosci* 33:761-775.
- 1061 Collins KM, Bode A, Fernandez RW, Tanis JE, Brewer JC, Creamer MS, Koelle MR (2016) Activity of  
1062 the *C. elegans* egg-laying behavior circuit is controlled by competing activation and  
1063 feedback inhibition. *Elife* 5:e21126.
- 1064 Desai C, Garriga G, McIntire SL, Horvitz HR (1988) A genetic pathway for the development of the  
1065 *Caenorhabditis elegans* HSN motor neurons. *Nature* 336:638-646.



- 1066 Dong MQ, Chase D, Patikoglou GA, Koelle MR (2000) Multiple RGS proteins alter neural G protein  
1067 signaling to allow *C. elegans* to rapidly change behavior when fed. *Genes Dev* 14:2003-  
1068 2014.
- 1069 Emtage L, Aziz-Zaman S, Padovan-Merhar O, Horvitz HR, Fang-Yen C, Ringstad N (2012) IRK-1  
1070 potassium channels mediate peptidergic inhibition of *Caenorhabditis elegans* serotonin  
1071 neurons via a G(o) signaling pathway. *J Neurosci* 32:16285-16295.
- 1072 Fenk LA, de Bono M (2015) Environmental CO<sub>2</sub> inhibits *Caenorhabditis elegans* egg-laying by  
1073 modulating olfactory neurons and evokes widespread changes in neural activity. *Proc Natl*  
1074 *Acad Sci U S A* 112:E3525-3534.
- 1075 Flavell SW, Pokala N, Macosko EZ, Albrecht DR, Larsch J, Bargmann CI (2013) Serotonin and the  
1076 neuropeptide PDF initiate and extend opposing behavioral states in *C. elegans*. *Cell*  
1077 154:1023-1035.
- 1078 Fujiwara M, Sengupta P, McIntire SL (2002) Regulation of body size and behavioral state of *C.*  
1079 *elegans* by sensory perception and the EGL-4 cGMP-dependent protein kinase. *Neuron*  
1080 36:1091-1102.
- 1081 Fujiwara M, Hino T, Miyamoto R, Inada H, Mori I, Koga M, Miyahara K, Ohshima Y, Ishihara T  
1082 (2015) The Importance of cGMP Signaling in Sensory Cilia for Body Size Regulation in  
1083 *Caenorhabditis elegans*. *Genetics* 201:1497-1510.
- 1084 Gallagher T, Kim J, Oldenbroek M, Kerr R, You YJ (2013) ASI regulates satiety quiescence in *C.*  
1085 *elegans*. *J Neurosci* 33:9716-9724.
- 1086 Gao S, Zhen M (2011) Action potentials drive body wall muscle contractions in *Caenorhabditis*  
1087 *elegans*. *Proc Natl Acad Sci U S A* 108:2557-2562.
- 1088 Ghil S, Choi JM, Kim SS, Lee YD, Liao Y, Birnbaumer L, Suh-Kim H (2006) Compartmentalization of  
1089 protein kinase A signaling by the heterotrimeric G protein Go. *Proc Natl Acad Sci U S A*  
1090 103:19158-19163.
- 1091 Goulding EH, Schenk AK, Juneja P, MacKay AW, Wade JM, Tecott LH (2008) A robust automated  
1092 system elucidates mouse home cage behavioral structure. *Proc Natl Acad Sci U S A*  
1093 105:20575-20582.
- 1094 Gruninger TR, Gualberto DG, Garcia LR (2008) Sensory perception of food and insulin-like signals  
1095 influence seizure susceptibility. *PLoS Genet* 4:e1000117.
- 1096 Gruninger TR, Gualberto DG, LeBoeuf B, Garcia LR (2006) Integration of male mating and feeding  
1097 behaviors in *Caenorhabditis elegans*. *J Neurosci* 26:169-179.
- 1098 Gurel G, Gustafson MA, Pepper JS, Horvitz HR, Koelle MR (2012) Receptors and other signaling  
1099 proteins required for serotonin control of locomotion in *Caenorhabditis elegans*. *Genetics*  
1100 192:1359-1371.
- 1101 Hallem EA, Spencer WC, McWhirter RD, Zeller G, Henz SR, Ratsch G, Miller DM, 3rd, Horvitz HR,  
1102 Sternberg PW, Ringstad N (2011) Receptor-type guanylate cyclase is required for carbon  
1103 dioxide sensation by *Caenorhabditis elegans*. *Proc Natl Acad Sci U S A* 108:254-259.
- 1104 Hao Y, Xu N, Box AC, Schaefer L, Kannan K, Zhang Y, Florens L, Seidel C, Washburn MP, Wiegand  
1105 W, Mak HY (2011) Nuclear cGMP-dependent kinase regulates gene expression via activity-  
1106 dependent recruitment of a conserved histone deacetylase complex. *PLoS Genet*  
1107 7:e1002065.
- 1108 Harfe BD, Fire A (1998) Muscle and nerve-specific regulation of a novel NK-2 class homeodomain  
1109 factor in *Caenorhabditis elegans*. *Development* 125:421-429.
- 1110 Herlitze S, Garcia DE, Mackie K, Hille B, Scheuer T, Catterall WA (1996) Modulation of Ca<sup>2+</sup>  
1111 channels by G-protein beta gamma subunits. *Nature* 380:258-262.
- 1112 Hille B (1994) Modulation of ion-channel function by G-protein-coupled receptors. *Trends*  
1113 *Neurosci* 17:531-536.

- 1114 Hobson RJ, Hapiak VM, Xiao H, Buehrer KL, Komuniecki PR, Komuniecki RW (2006) SER-7, a  
1115 *Caenorhabditis elegans* 5-HT7-like receptor, is essential for the 5-HT stimulation of  
1116 pharyngeal pumping and egg laying. *Genetics* 172:159-169.
- 1117 Iwanir S, Brown AS, Nagy S, Najjar D, Kazakov A, Lee KS, Zaslaver A, Levine E, Biron D (2016)  
1118 Serotonin promotes exploitation in complex environments by accelerating decision-  
1119 making. *BMC Biol* 14:9.
- 1120 Jiang M, Spicher K, Boulay G, Wang Y, Birnbaumer L (2001) Most central nervous system D2  
1121 dopamine receptors are coupled to their effectors by Go. *Proc Natl Acad Sci U S A* 98:3577-  
1122 3582.
- 1123 Jose AM, Bany IA, Chase DL, Koelle MR (2007) A specific subset of transient receptor potential  
1124 vanilloid-type channel subunits in *Caenorhabditis elegans* endocrine cells function as  
1125 mixed heteromers to promote neurotransmitter release. *Genetics* 175:93-105.
- 1126 Kobayashi I, Shibasaki H, Takahashi K, Tohyama K, Kurachi Y, Ito H, Ui M, Katada T (1990)  
1127 Purification and characterization of five different alpha subunits of guanine-nucleotide-  
1128 binding proteins in bovine brain membranes. Their physiological properties concerning the  
1129 activities of adenylate cyclase and atrial muscarinic K<sup>+</sup> channels. *Eur J Biochem* 191:499-  
1130 506.
- 1131 Koelle MR (2016) Neurotransmitter signaling through heterotrimeric G proteins: insights from  
1132 studies in *C. elegans*. *WormBook*:1-78.
- 1133 Koelle MR, Horvitz HR (1996) EGL-10 regulates G protein signaling in the *C. elegans* nervous  
1134 system and shares a conserved domain with many mammalian proteins. *Cell* 84:115-125.
- 1135 L'Etoile ND, Coburn CM, Eastham J, Kistler A, Gallegos G, Bargmann CI (2002) The cyclic GMP-  
1136 dependent protein kinase EGL-4 regulates olfactory adaptation in *C. elegans*. *Neuron*  
1137 36:1079-1089.
- 1138 Lackner MR, Nurrish SJ, Kaplan JM (1999) Facilitation of synaptic transmission by EGL-30 Gqalpha  
1139 and EGL-8 PLCbeta: DAG binding to UNC-13 is required to stimulate acetylcholine release.  
1140 *Neuron* 24:335-346.
- 1141 Laine V, Segor JR, Zhan H, Bessereau JL, Jospin M (2014) Hyperactivation of L-type voltage-gated  
1142 Ca<sup>2+</sup> channels in *Caenorhabditis elegans* striated muscle can result from point mutations in  
1143 the IS6 or the IIS4 segment of the alpha1 subunit. *J Exp Biol* 217:3805-3814.
- 1144 LeBoeuf B, Gruninger TR, Garcia LR (2007) Food deprivation attenuates seizures through CaMKII  
1145 and EAG K<sup>+</sup> channels. *PLoS Genet* 3:1622-1632.
- 1146 Lee KS, Iwanir S, Kopito RB, Scholz M, Calarco JA, Biron D, Levine E (2017) Serotonin-dependent  
1147 kinetics of feeding bursts underlie a graded response to food availability in *C. elegans*. *Nat*  
1148 *Commun* 8:14221.
- 1149 Lee RY, Lobel L, Hengartner M, Horvitz HR, Avery L (1997) Mutations in the alpha1 subunit of an  
1150 L-type voltage-activated Ca<sup>2+</sup> channel cause myotonia in *Caenorhabditis elegans*. *EMBO J*  
1151 16:6066-6076.
- 1152 Li P, Collins KM, Koelle MR, Shen K (2013) LIN-12/Notch signaling instructs postsynaptic muscle  
1153 arm development by regulating UNC-40/DCC and MADD-2 in *Caenorhabditis elegans*. *Elife*  
1154 2:e00378.
- 1155 Liu P, Ge Q, Chen B, Salkoff L, Kotlikoff MI, Wang ZW (2011) Genetic dissection of ion currents  
1156 underlying all-or-none action potentials in *C. elegans* body-wall muscle cells. *J Physiol*  
1157 589:101-117.
- 1158 Liu Q, Kidd PB, Dobosiewicz M, Bargmann CI (2018) *C. elegans* AWA Olfactory Neurons Fire  
1159 Calcium-Mediated All-or-None Action Potentials. *Cell* 175:57-70 e17.
- 1160 Lopez-Cruz A, Sordillo A, Pokala N, Liu Q, McGrath PT, Bargmann CI (2019) Parallel Multimodal  
1161 Circuits Control an Innate Foraging Behavior. *Neuron* 102:407-419 e408.

- 1162 Lutas A, Lahmann C, Soumillon M, Yellen G (2016) The leak channel NALCN controls tonic firing  
1163 and glycolytic sensitivity of substantia nigra pars reticulata neurons. *Elife* 5.
- 1164 Marder E (2012) Neuromodulation of neuronal circuits: back to the future. *Neuron* 76:1-11.
- 1165 Mase Y, Yokogawa M, Osawa M, Shimada I (2012) Structural basis for modulation of gating  
1166 property of G protein-gated inwardly rectifying potassium ion channel (GIRK) by i/o-family  
1167 G protein alpha subunit (Galpai/o). *J Biol Chem* 287:19537-19549.
- 1168 Mathews EA, Garcia E, Santi CM, Mullen GP, Thacker C, Moerman DG, Snutch TP (2003) Critical  
1169 residues of the *Caenorhabditis elegans* unc-2 voltage-gated calcium channel that affect  
1170 behavioral and physiological properties. *J Neurosci* 23:6537-6545.
- 1171 Matsubara H (2002) [Angiotensin II type 2 (AT2) receptor signal and cardiovascular action].  
1172 *Nihon Yakurigaku Zasshi* 119:95-102.
- 1173 Mendel JE, Korswagen HC, Liu KS, Hajdu-Cronin YM, Simon MI, Plasterk RH, Sternberg PW (1995)  
1174 Participation of the protein Go in multiple aspects of behavior in *C. elegans*. *Science*  
1175 267:1652-1655.
- 1176 Miller KG, Emerson MD, Rand JB (1999) Gqalpha and diacylglycerol kinase negatively regulate the  
1177 Gqalpha pathway in *C. elegans*. *Neuron* 24:323-333.
- 1178 Moresco JJ, Koelle MR (2004) Activation of EGL-47, a Galpha(o)-coupled receptor, inhibits function  
1179 of hermaphrodite-specific motor neurons to regulate *Caenorhabditis elegans* egg-laying  
1180 behavior. *J Neurosci* 24:8522-8530.
- 1181 Mumby SM, Heukeroth RO, Gordon JI, Gilman AG (1990) G-protein alpha-subunit expression,  
1182 myristoylation, and membrane association in COS cells. *Proc Natl Acad Sci U S A* 87:728-  
1183 732.
- 1184 Nakamura K et al. (2013) De Novo mutations in GNAO1, encoding a Galphao subunit of  
1185 heterotrimeric G proteins, cause epileptic encephalopathy. *Am J Hum Genet* 93:496-505.
- 1186 Nurrish S, Segalat L, Kaplan JM (1999) Serotonin inhibition of synaptic transmission: Galpha(0)  
1187 decreases the abundance of UNC-13 at release sites. *Neuron* 24:231-242.
- 1188 Peleg S, Varon D, Ivanina T, Dessauer CW, Dascal N (2002) G(alpha)(i) controls the gating of the G  
1189 protein-activated K(+) channel, GIRK. *Neuron* 33:87-99.
- 1190 Qin N, Platano D, Olcese R, Stefani E, Birnbaumer L (1997) Direct interaction of gbetagamma with  
1191 a C-terminal gbetagamma-binding domain of the Ca<sup>2+</sup> channel alpha1 subunit is  
1192 responsible for channel inhibition by G protein-coupled receptors. *Proc Natl Acad Sci U S A*  
1193 94:8866-8871.
- 1194 Raizen DM, Cullison KM, Pack AI, Sundaram MV (2006) A novel gain-of-function mutant of the  
1195 cyclic GMP-dependent protein kinase egl-4 affects multiple physiological processes in  
1196 *Caenorhabditis elegans*. *Genetics* 173:177-187.
- 1197 Ravi B, Garcia J, Collins KM (2018a) Homeostatic feedback modulates the development of two-  
1198 state patterned activity in a model serotonin motor circuit in *Caenorhabditis elegans*. *J*  
1199 *Neurosci* 38:6283-6298.
- 1200 Ravi B, Nassar LM, Kopchock RJ, 3rd, Dhakal P, Scheetz M, Collins KM (2018b) Ratiometric calcium  
1201 imaging of individual neurons in behaving *Caenorhabditis elegans*. *J Vis Exp*.
- 1202 Reuveny E, Slesinger PA, Inglese J, Morales JM, Iniguez-Lluhi JA, Lefkowitz RJ, Bourne HR, Jan YN,  
1203 Jan LY (1994) Activation of the cloned muscarinic potassium channel by G protein beta  
1204 gamma subunits. *Nature* 370:143-146.
- 1205 Ringstad N, Horvitz HR (2008) FMRamide neuropeptides and acetylcholine synergistically inhibit  
1206 egg-laying by *C. elegans*. *Nat Neurosci* 11:1168-1176.
- 1207 Robatzek M, Thomas JH (2000) Calcium/calmodulin-dependent protein kinase II regulates  
1208 *Caenorhabditis elegans* locomotion in concert with a G(o)/G(q) signaling network. *Genetics*  
1209 156:1069-1082.

- 1210 Schade MA, Reynolds NK, Dollins CM, Miller KG (2005) Mutations that rescue the paralysis of  
1211 *Caenorhabditis elegans ric-8* (synembryn) mutants activate the G $\alpha$ (s) pathway and  
1212 define a third major branch of the synaptic signaling network. *Genetics* 169:631-649.
- 1213 Schafer WR, Kenyon CJ (1995) A calcium-channel homologue required for adaptation to dopamine  
1214 and serotonin in *Caenorhabditis elegans*. *Nature* 375:73-78.
- 1215 Scholz M, Dinner AR, Levine E, Biron D (2017) Stochastic feeding dynamics arise from the need for  
1216 information and energy. *Proc Natl Acad Sci U S A* 114:9261-9266.
- 1217 Segalat L, Elkes DA, Kaplan JM (1995) Modulation of serotonin-controlled behaviors by Go in  
1218 *Caenorhabditis elegans*. *Science* 267:1648-1651.
- 1219 Tanis JE, Moresco JJ, Lindquist RA, Koelle MR (2008) Regulation of serotonin biosynthesis by the G  
1220 proteins Galphao and Galphaq controls serotonin signaling in *Caenorhabditis elegans*.  
1221 *Genetics* 178:157-169.
- 1222 Tanis JE, Bellemer A, Moresco JJ, Forbush B, Koelle MR (2009) The potassium chloride  
1223 cotransporter KCC-2 coordinates development of inhibitory neurotransmission and  
1224 synapse structure in *Caenorhabditis elegans*. *J Neurosci* 29:9943-9954.
- 1225 Topalidou I, Cooper K, Pereira L, Ailion M (2017a) Dopamine negatively modulates the NCA ion  
1226 channels in *C. elegans*. *PLoS Genet* 13:e1007032.
- 1227 Topalidou I, Chen PA, Cooper K, Watanabe S, Jorgensen EM, Ailion M (2017b) The NCA-1 and NCA-  
1228 2 Ion Channels Function Downstream of Gq and Rho To Regulate Locomotion in  
1229 *Caenorhabditis elegans*. *Genetics* 206:265-282.
- 1230 Trent C, Tsuing N, Horvitz HR (1983) Egg-laying defective mutants of the nematode  
1231 *Caenorhabditis elegans*. *Genetics* 104:619-647.
- 1232 Tsai EJ, Kass DA (2009) Cyclic GMP signaling in cardiovascular pathophysiology and therapeutics.  
1233 *Pharmacol Ther* 122:216-238.
- 1234 Waggoner LE, Zhou GT, Schafer RW, Schafer WR (1998) Control of alternative behavioral states by  
1235 serotonin in *Caenorhabditis elegans*. *Neuron* 21:203-214.
- 1236 White JG, Southgate E, Thomson JN, Brenner S (1986) The structure of the nervous system of the  
1237 nematode *Caenorhabditis elegans*. *Philos Trans R Soc Lond B Biol Sci* 314:1-340.
- 1238 Williams SL, Lutz S, Charlie NK, Vettel C, Ailion M, Coco C, Tesmer JJ, Jorgensen EM, Wieland T,  
1239 Miller KG (2007) Trio's Rho-specific GEF domain is the missing Galpha q effector in *C.*  
1240 *elegans*. *Genes Dev* 21:2731-2746.
- 1241 Xiao H, Hapiak VM, Smith KA, Lin L, Hobson RJ, Plenefisch J, Komuniecki R (2006) SER-1, a  
1242 *Caenorhabditis elegans* 5-HT<sub>2</sub>-like receptor, and a multi-PDZ domain containing protein  
1243 (MPZ-1) interact in vulval muscle to facilitate serotonin-stimulated egg-laying. *Dev Biol*  
1244 298:379-391.
- 1245 Yamada K, Hirotsu T, Matsuki M, Kunitomo H, Iino Y (2009) GPC-1, a G protein gamma-subunit,  
1246 regulates olfactory adaptation in *Caenorhabditis elegans*. *Genetics* 181:1347-1357.
- 1247 Yeh E, Ng S, Zhang M, Bouhours M, Wang Y, Wang M, Hung W, Aoyagi K, Melnik-Martinez K, Li M,  
1248 Liu F, Schafer WR, Zhen M (2008) A putative cation channel, NCA-1, and a novel protein,  
1249 UNC-80, transmit neuronal activity in *C. elegans*. *PLoS Biol* 6:e55.
- 1250 You YJ, Kim J, Raizen DM, Avery L (2008) Insulin, cGMP, and TGF-beta signals regulate food intake  
1251 and quiescence in *C. elegans*: a model for satiety. *Cell Metab* 7:249-257.
- 1252 Yue X, Zhao J, Li X, Fan Y, Duan D, Zhang X, Zou W, Sheng Y, Zhang T, Yang Q, Luo J, Duan S, Xiao R,  
1253 Kang L (2018) TMC Proteins Modulate Egg Laying and Membrane Excitability through a  
1254 Background Leak Conductance in *C. elegans*. *Neuron* 97:571-585 e575.
- 1255 Zang KE, Ho E, Ringstad N (2017) Inhibitory peptidergic modulation of *C. elegans* serotonin  
1256 neurons is gated by T-type calcium channels. *Elife* 6:e22771.

- 1257 Zhang J, Pratt RE (1996) The AT2 receptor selectively associates with Gialpha2 and Gialpha3 in  
1258 the rat fetus. *J Biol Chem* 271:15026-15033.
- 1259 Zhang M, Chung SH, Fang-Yen C, Craig C, Kerr RA, Suzuki H, Samuel AD, Mazur E, Schafer WR  
1260 (2008) A self-regulating feed-forward circuit controlling *C. elegans* egg-laying behavior.  
1261 *Curr Biol* 18:1445-1455.
- 1262 Zou W, Fu J, Zhang H, Du K, Huang W, Yu J, Li S, Fan Y, Baylis HA, Gao S, Xiao R, Ji W, Kang L, Xu T  
1263 (2018) Decoding the intensity of sensory input by two glutamate receptors in one *C.*  
1264 *elegans* interneuron. *Nat Commun* 9:4311.
- 1265
